1 **Lethality of SARS-CoV-2 infection in K18 human angiotensin converting enzyme 2**  
2 **transgenic mice**

3

4 **Authors:** Fatai S. Oladunni<sup>1</sup> § , Jun-Gyu Park<sup>1</sup> § , Paula Pino Tamayo<sup>1</sup> § , Olga Gonzalez<sup>1</sup> § ,  
5 Anwari Akhter<sup>1</sup> § , Anna Allué-Guardia<sup>1</sup> § , Angélica Olmo-Fontánez<sup>1,2</sup>, Shalini Gautam<sup>1</sup>, Andreu  
6 Garcia-Vilanova<sup>1</sup>, Chengjin Ye<sup>1</sup>, Kevin Chiem<sup>1,2</sup>, Colwyn Headley<sup>1</sup>, Varun Dwivedi<sup>1</sup>, Laura M.  
7 Parodi<sup>1</sup>, Kendra J. Alfson<sup>1</sup>, Hilary M. Staples<sup>1</sup>, Alyssa Schami<sup>1,2</sup>, Juan I. Garcia<sup>1</sup>, Alison  
8 Whigham<sup>1</sup>, Roy Neal Platt II<sup>1</sup>, Michal Gazi<sup>1</sup>, Jesse Martinez<sup>1</sup>, Colin Chuba<sup>1</sup>, Stephanie Earley<sup>1</sup>,  
9 Oscar H Rodriguez<sup>1</sup>, Stephanie Davis Mdaki<sup>1</sup>, Katrina N Kavelish<sup>1</sup>, Renee Escalona<sup>1</sup>, Cory R. A.  
10 Hallam<sup>1</sup>, Corbett Christie<sup>1</sup>, Jean L. Patterson<sup>1</sup>, Tim J. C. Anderson<sup>1</sup>, Ricardo Carrion Jr<sup>1</sup>, Edward  
11 J. Dick Jr<sup>1</sup>, Shannan Hall-Ursone<sup>1</sup>, Larry S. Schlesinger<sup>1</sup>, Deepak Kaushal<sup>1</sup>, Luis D. Giavedoni<sup>1</sup>,  
12 Xavier Alvarez<sup>1</sup>, Joanne Turner<sup>1,\*</sup>, Luis Martinez-Sobrido<sup>1,\*</sup> and Jordi B. Torrelles<sup>1,\*</sup>

13

14 **Affiliations:** <sup>1</sup>Texas Biomedical Research Institute, San Antonio, TX, 78227, USA, and  
15 <sup>2</sup>Integrated Biomedical Sciences Program, University of Texas Health Science Center at San  
16 Antonio, TX, 78229, USA.

17

18 § Authors contributed equally in this study

19

20 **\*Corresponding authors:** Dr. Luis Martinez-Sobrido, [lmartinez@txbiomed.org](mailto:lmartinez@txbiomed.org); Dr. Jordi B.  
21 Torrelles, [jtorrelles@txbiomed.org](mailto:jtorrelles@txbiomed.org); and Dr. Joanne Turner, [joanneturner@txbiomed.org](mailto:joanneturner@txbiomed.org).

22

23 **Keywords:** COVID-19, SARS-CoV-2, SARS-CoV-1, hACE2 protein, mouse model, infectivity,  
24 chemokine and cytokine storm

25

26 **ABSTRACT**

27 Vaccine and antiviral development against SARS-CoV-2 infection or COVID-19 disease currently  
28 lacks a validated small animal model. Here, we show that transgenic mice expressing human  
29 angiotensin converting enzyme 2 (hACE2) by the human cytokeratin 18 promoter (K18 hACE2)  
30 represent a susceptible rodent model. K18 hACE2-transgenic mice succumbed to SARS-CoV-2  
31 infection by day 6, with virus detected in lung airway epithelium and brain. K18 ACE2-transgenic  
32 mice produced a modest TH1/2/17 cytokine storm in the lung and spleen that peaked by day 2,  
33 and an extended chemokine storm that was detected in both lungs and brain. This chemokine  
34 storm was also detected in the brain at day 4. K18 hACE2-transgenic mice are, therefore, highly  
35 susceptible to SARS-CoV-2 infection and represent a suitable animal model for the study of viral  
36 pathogenesis, and for identification and characterization of vaccines (prophylactic) and antivirals  
37 (therapeutics) for SARS-CoV-2 infection and associated severe COVID-19 disease.

38

39

40

41

42

43

44

45

46

47

48

49

50

51

## 52 INTRODUCTION

53 Human angiotensin-converting enzyme 2 (hACE2) protein is the functional receptor used by  
54 severe acute respiratory syndrome coronavirus 1 (SARS-CoV-1) to gain entry to cells.<sup>1,2</sup> Recently  
55 hACE2 has also been described as the receptor for acute respiratory syndrome coronavirus 2  
56 (SARS-CoV-2),<sup>3-5</sup> the etiological agent responsible for coronavirus disease 2019 (COVID-19).  
57 SARS-CoV-2 emerged in the city of Wuhan, China, in December 2019, causing a pandemic that  
58 has dramatically impacted public health and socioeconomic activities across the world.<sup>6-10</sup>  
59 Importantly, hACE2 is widely expressed in the lung, central nervous system, cardiovascular  
60 system, kidneys, gut, and adipose tissues where it negatively regulates the renin-angiotensin  
61 system, and facilitates amino acid transport.<sup>5</sup>

62

63 K18 hACE2 transgenic mice [B6.Cg-Tg(K18-ACE2)2PrImn/J] are susceptible to SARS-CoV-1  
64 infection<sup>11</sup> and recent reports suggest that K18 hACE2 transgenic mice can also be infected with  
65 SARS-CoV-2.<sup>12,13</sup> hACE2 expression in K18 hACE2 transgenic mice is driven by the human  
66 cytokeratin 18 (K18) promoter.<sup>11</sup> Importantly, hACE2 expression in K18 hACE2 transgenic mice  
67 is observed in airway epithelial cells where SARS-CoV-1 and SARS-CoV-2 infections are typically  
68 initiated. Recent research indicates that hACE2-expressing mice are useful for studies related to  
69 SARS-CoV-2 pathogenesis and COVID-19.<sup>12-16</sup> A validated rodent model of SARS-CoV-2  
70 infection could help to accelerate testing of vaccines (prophylactic) and antivirals (therapeutic) for  
71 the prevention and treatment, respectively, of SARS-CoV-2 infection and associated severe  
72 COVID-19 disease. Compared to large animals, a murine model would have desirable features  
73 of tractability, ease of use and availability, be cost efficient and permit mechanistic studies to  
74 identify attributes of severe COVID-19 outcomes in some but not all people who are infected.

75

76 Transgenic mice expressing hACE2 have been developed using various promoters that produce  
77 mild to moderate SARS-CoV-2 infection in a variety of organs, in addition to physiological (weight

78 loss, interstitial pneumonia) or immunological (anti-spike IgG) changes.<sup>12-16</sup> No transgenic mice  
79 models to date have led to SARS-CoV-2 infection-induced mortality.<sup>15</sup> Adenovirus-based delivery  
80 of hACE2 (Ad4-hACE2) to wild-type (WT) C57BL/6 mice resulted in susceptibility to SARS-CoV-  
81 2 infection but not mortality.<sup>13,15</sup> K18 hACE2 transgenic mice have previously been shown to  
82 represent a good animal model for SARS-CoV-1 infection and associated disease.<sup>11</sup> However,  
83 the susceptibility of K18 hACE2 transgenic mice to succumb to SARS-CoV-2 infection has not yet  
84 been fully determined.

85

86 In this study, we infected K18 hACE2 transgenic mice with SARS-CoV-2 to assess the feasibility  
87 of its use as an animal model of SARS-CoV-2 infection and associated COVID-19 disease.  
88 Contrary to other constitutively or transiently expressing hACE2 mouse models,<sup>12-19</sup> K18 hACE2  
89 transgenic mice were highly susceptible to SARS-CoV-2 infection, with all mice rapidly losing  
90 weight and succumbing to viral infection by 5-6 days post-infection (DPI). Importantly, morbidity  
91 and mortality correlated with SARS-CoV-2 replication in the nasal turbinates, lungs and brains at  
92 2- and 4-DPI. Notably, susceptibility was highly associated with a local and systemic chemokine  
93 storm, mild to moderate tissue pathology that included vasculitis, and the presence of SARS-CoV-  
94 2 nucleocapsid protein (NP) antigen and hACE2 expression in the nasal turbinates and lung  
95 epithelium. In contrast, WT C57BL/6 mice survived viral infection with no changes in body weight  
96 and undetectable viral replication, NP antigen and hACE2 expression. Altogether, our data  
97 provide evidence that K18 hACE2 transgenic mice represent an excellent animal model of SARS-  
98 CoV-2 infection and associated severe COVID-19 disease, providing the research community  
99 with a much needed small animal model to evaluate vaccines and/or antivirals for SARS-CoV-2  
100 infection and associated severe COVID-19 disease *in vivo*.

101

102

103

## 104 **MATERIALS AND METHODS**

### 105 **Ethics statement**

106 All experimental procedures with animals were approved by the Texas Biomedical Research  
107 Institute (Texas Biomed) Institutional Biosafety Committee (IBC, #20-004 and #20-010) and  
108 Institutional Animal Care and Use Committee (IACUC, #1708 MU) and under Biosafety Level 3  
109 (BSL3) and animal BSL3 (ABSL3) facilities at Texas Biomed.

110

### 111 **Virus, cells and viral propagation**

112 SARS-CoV-2, USA-WA1/2020 strain (Gen Bank: MN985325.1), was obtained from BEI  
113 Resources (NR-52281). SARS-CoV-2 USA-WA1/2020 was isolated from an oropharyngeal swab  
114 from a patient with a respiratory illness in January 2020 in Washington, US. The virus stock  
115 obtained from BEI Resources was a passage (P)4 stock, and was used to generate a master P5  
116 seed stock. The P5 stock was used to generate a P6 working stock. P5 and P6 stocks of SARS-  
117 CoV-2 were generated by infecting at low multiplicity of infection (MOI, 0.001) Vero E6 cells  
118 obtained from the American Type Culture Collection (ATCC, CRL-1586). At 72 h post-infection,  
119 tissue culture supernatants (TCS) were collected and clarified before being aliquoted and stored  
120 at -80°C. Standard plaque assays (plaque forming units, PFU/ml) in Vero E6 cells were used to  
121 titrate P5 ( $1.7 \times 10^6$  plaque forming units, PFU/ml) and P6 ( $2.6 \times 10^6$  PFU/ml) viral stocks.

122

### 123 **Mice**

124 Specific-pathogen-free, 4-5-weeks-old, female and male B6.Cg-Tg(K18-hACE2)2PrImn/J (Stock  
125 No: 034860, K18 hACE2) hemi-zygotes, or wild-type (WT) C57BL/6 control mice, were purchased  
126 from The Jackson Laboratory (Bar Harbor, ME). K18 hACE2 transgenic and WT C57BL/6 mice  
127 were identically maintained in micro-isolator cages at Animal Biosafety Level (ABSL)-2 for  
128 noninfectious studies, or at ABSL-3 for studies involving SARS-CoV-2. Mice were provided sterile

129 water and chow *ad libitum* and acclimatized for at least one week prior to experimental  
130 manipulation.

131  
132 Based on the limited number of K18 hACE2 transgenic mice from The Jackson Laboratory, n=3  
133 each for female and male mice were used for morbidity and mortality studies, while n=4 each for  
134 female and male mice were used for viral titers at 2- and 4-DPI, respectively. An n=3 each for  
135 female and male K18 hACE2 transgenic mice were used as mock-infected controls in the  
136 morbidity and mortality studies, and 1 male and 1 female for all other studies. Equal numbers of  
137 matched female and male WT C57BL/6 control mice were used in this study.

138

### 139 **Mouse infection and sample processing**

140 Female (n=3) and male (n=3) K18 hACE2 transgenic and WT C57BL/6 mice were either mock  
141 (PBS)-infected (controls) or infected intranasally (i.n.) with 10<sup>5</sup> PFU of SARS-CoV-2 in a final  
142 volume of 50 µl following isoflurane sedation. Limited numbers of available K18 hACE2 transgenic  
143 mice reduced the study to a single exposure dose of SARS-CoV-2. After viral infection, mice were  
144 monitored daily for morbidity (body weight) and mortality (survival). Mice showing more than 25%  
145 loss of their initial body weight were defined as reaching experimental end-point and humanely  
146 euthanized. In parallel, K18 hACE2 transgenic or WT C57BL/6 female (n=8) and male (n=8) mice  
147 were infected and euthanized at days 2 (n=4/sex) or 4 (n=4/sex) DPI. Ten tissues (nasal turbinate,  
148 trachea, lung, heart, kidney, liver, spleen, small intestine, large intestine, and brain) were  
149 harvested from each mouse. Half organ was fixed in 10% neutral buffered formalin solution for  
150 molecular pathology analyses and the other half was homogenized in 1mL of PBS using a  
151 Precellys tissue homogenizer (Bertin Instruments) for viral titration. Tissue homogenates were  
152 centrifuged at 21,500 x g for 5 min and supernatants were collected for measurement of viral load  
153 and chemokine/cytokine analyses.

154

155 **Measurement of viral loads**

156 Confluent monolayers of Vero E6 cells (96-well plate format,  $4 \times 10^4$  cells/well, duplicates) were  
157 infected with 10-fold serial dilutions of supernatants obtained from the organ homogenates. Virus  
158 was adsorbed for 1 h at 37°C in a humidified 5% CO<sub>2</sub> incubator. After viral adsorption, cells were  
159 washed with PBS and incubated in post-infection media containing 1% microcrystalline cellulose  
160 (Avicel, Sigma-Aldrich). Infected cells were incubated in a humidified 5% CO<sub>2</sub> incubator at 37°C  
161 for 24 h. After viral infection, plates were inactivated in 10% neutral buffered formalin  
162 (ThermoFisher Scientific) for 24 h. For immunostaining, cells were washed three times with PBS  
163 and permeabilized with 0.5% Triton X-100 for 10 min at room temperature. Cells were then  
164 blocked with 2.5% bovine serum albumin (BSA) in PBS for 1 h at 37°C, followed by incubation  
165 with 1 µg/ml of a SARS-CoV-1 NP cross-reactive monoclonal antibody (MAb), 1C7, diluted in 1%  
166 BSA for 1 h at 37°C. After incubation with the primary NP MAb, cells were washed three times  
167 with PBS, and developed with the Vectastain ABC kit and DAB Peroxidase Substrate kit (Vector  
168 Laboratory, Inc., CA, USA) according to the manufacturers' instructions. Viral titers were  
169 calculated as PFU/mL.

170

171 **Multiplex cytokine assay**

172 Cytokines and pro-inflammatory markers were measured using a custom 18-multiplex panel  
173 mouse magnetic bead Luminex assay (R&D Systems, Mouse 18-Plex, lot L134111), following the  
174 manufacturer's instructions. Immunoassays were performed in the ABSL-3 and samples  
175 decontaminated by an overnight incubation in 1% formalin solution before readout on a Luminex  
176 100/200 System with the following parameters: gate 8,000-16,500, 50 µl of sample volume, 50-  
177 100 events per bead, sample timeout 60 seconds, low PMT (LMX100/200: Default).

178

179

180

## 181 **Interferon (IFN) ELISA**

182 Mouse IFN- $\alpha$  (Type I) and IFN- $\lambda$  (Type III) were measured by enzyme-linked immunosorbent  
183 assays (ELISA) (PBL Assay Science) following the manufacturer's recommendations, detecting  
184 all 14 known IFN- $\alpha$  subtypes and IFN- $\lambda$  2 and 3.

185

## 186 **Histopathology analyses**

187 Tissues were fixed in 10% neutral buffered formalin, embedded in paraffin blocks, and sectioned  
188 at 4 $\mu$ m thickness. Sections were stained with Haemotoxylin and Eosin (H&E) and evaluated using  
189 light microscopy in a blinded manner by a board certified veterinary pathologist.

190

## 191 **Immunohistochemistry assays**

192 Immunostaining and confocal microscopy were performed as previously described.<sup>20,21</sup> Briefly, 5  
193  $\mu$ m tissues sections were mounted on Superfrost Plus Microscope slides, baked overnight at 56°C  
194 and passed through Xylene, graded ethanol, and double distilled water to remove paraffin and  
195 rehydrate tissue sections. A microwave was used for heat induced epitope retrieval (HIER). Slides  
196 were boiled for 20 min in a TRIS-based solution, pH 9.0 (Vector Labs H-3301), containing 0.01%  
197 Tween-20. Slides were briefly rinsed in distilled hot water, and transferred to a hot citrate based  
198 solution, pH 6.0 (Vector Labs H-3300) and cooled to room temperature. Once cool, slides were  
199 rinsed in TRIS buffered saline (TBS) and placed in a black, humidifying chamber and incubated  
200 with Background Punisher (Biocare Medical BP974H) for 40 minutes. Subsequently, slides were  
201 stained with primary rabbit antibodies against the following proteins: SARS-CoV-1 NP at 1:4,000  
202 dilution (a rabbit polyclonal antibody shown to cross-react with SARS-CoV-2 NP), hACE2 receptor  
203 (hACE2 Recombinant Rabbit Monoclonal Antibody, 1:50, Thermo-Fisher, Cat#SN0754) and  
204 DAPI nuclear stain (1:20,000, Invitrogen, Carlsbad, CA). The primary antibodies were detected  
205 with goat anti-rabbit-AP developed with Permanent Red warp (mach3 Biocare Medical).



206 **Statistical analysis**

207 Statistical significance was determined using Prism 8 software (GraphPad Software, San Diego,  
208 CA). The unpaired, two-tailed Student's *t*-test was used for two group comparisons for each time-  
209 point and reported as \* $p < 0.05$ ; \*\*,  $p < 0.005$ ; \*\*\*,  $p < 0.0005$ . For individual cytokine/chemokine  
210 analyses, correlations were made between analyte concentrations [measured as the area under  
211 the curve (AUC) or the peak concentration] and viremia using linear regression by hierarchically  
212 clustered Pearson test. Multiple comparisons among groups and/or time-points were analyzed  
213 using one-way ANOVA with Tukey's post-test and reported as § ,  $p < 0.05$ ; § § ,  $p < 0.005$ ; § § §  
214 ,  $p < 0.0005$ .

215

216

217

218

219

220

221

222

223

224

225

226

227

228

229

230

231 **RESULTS**

232 **K18 hACE2 transgenic mice are susceptible to SARS-CoV-2 infection**

233 K18 hACE2 transgenic and WT C57BL/6 mice were i.n. mock-infected (PBS), or infected with  
234  $1 \times 10^5$  PFU of SARS-CoV-2, USA-WA1/2020 strain, and followed for body weight loss and survival  
235 for 14 days. Because of the limited number of K18 hACE2 transgenic mice provided by The  
236 Jackson Laboratory, 3 female and 3 male mice per group were used for body weight and survival  
237 studies while 4 female and 4 male mice per group were used for viral titers, chemokine/cytokine,  
238 histopathology and immunohistochemistry analyses at 2 and 4 DPI. The mock-infected groups  
239 included 3 female and 3 male mice. The same matched groups of WT C57BL/6 female and male  
240 mice were included in this experiment.

241

242 By 5-DPI, SARS-CoV-2 infected K18 hACE2 transgenic mice lost over 20% of their initial body  
243 weight, were lethargic with rough fur and hunched appearance, immobile, and did not eat or drink,  
244 and succumbed to the infection by 6-DPI (**Figs 1A, B**). All K18 hACE2 transgenic mice  
245 succumbed to infection by 6-DPI, with the exception of one that was humanely euthanized due to  
246 IACUC-defined endpoints. Mock-infected K18 hACE2 transgenic or WT C57BL/6 mice, or SARS-  
247 CoV-2 infected WT C57BL/6 mice appeared healthy, maintained weight, and all survived SARS-  
248 CoV-2 infection for the duration of this study (**Figs 1A, B**). Differentiating by sex, we observed  
249 that SARS-CoV-2 infected male K18 hACE2 transgenic mice lost weight starting 1-DPI, at the  
250 rate of approximately 5% per day whereas SARS-CoV-2 infected female K18 hACE2 transgenic  
251 mice did not begin to lose weight until 3-DPI (**Fig S1**). In both cases, after 3-DPI, morbidity  
252 indicators accelerated until all K18 hACE2 transgenic mice, independent of sex, succumbed to  
253 SARS-CoV-2 infection by 6-DPI (**Fig S1**).

254

255 To correlate body weight loss (**Fig. 1A**) and survival (**Fig. 1B**) with viral replication, female (n=8)  
256 and male (n=8) K18 hACE2 transgenic and WT C57BL/6 mice were similarly mock-infected or

257 infected with  $1 \times 10^5$  PFU of SARS-CoV-2 and euthanized at 2- or 4-DPI, to determine viral titers  
258 in the nasal turbinate, trachea, lung, heart, kidney, liver, spleen, small intestine, large intestine,  
259 and brain. By 2-DPI, K18 hACE2 transgenic mice had  $\sim 1 \times 10^3$  PFU in nasal turbinate and  $\sim 1 \times 10^4$   
260 PFU in lung, indicating the presence of SARS-CoV-2 in both the upper and lower respiratory  
261 tracts. Viral titers at both sites were maintained at 4-DPI (**Figs 1C, D**). SARS-CoV-2 was also  
262 detected in the brain at 4-DPI ( $\sim 1 \times 10^3$  PFU) (**Fig 1E**), but absent in all other organs. In all organs  
263 where SARS-CoV-2 was detected (nasal turbinate, lung and brain), we observed no sex  
264 differences in viral titers (**Fig S2**). SARS-CoV-2 infected WT C57BL/6 mice had undetectable viral  
265 loads at both DPI in all organs studied, in accordance with previous studies suggesting that WT  
266 C57BL/6 mice are resistant to SARS-CoV-2 infection (**Figs 1A-E, S1 and S2**).<sup>15</sup> Taken together,  
267 these results demonstrate the susceptibility of K18 hACE2 transgenic mice, but not WT C57BL/6  
268 mice, to SARS-CoV-2 infection at the studied MOI, with detectable virus in the upper and lower  
269 respiratory tract, and brain, at early time points post-infection.

270

## 271 **SARS-CoV-2 infection of K18 hACE2 transgenic mice drives a local and systemic** 272 **chemokine storm**

273 An early (2-DPI) chemokine storm was observed in the lungs of K18 hACE2 transgenic mice  
274 infected with SARS-CoV-2 (**Fig 2A**). MIP-2/CXCL2, MCP-1/CCL2, MIP-1 $\alpha$ /CCL3, MIP-1 $\beta$ /CCL4,  
275 RANTES/CCL5 and IP-10/CXCL10 levels were significantly increased in the lungs relative to  
276 C57BL/6 WT infected mice or mock-infected K18 hACE2 transgenic mice. At 4-DPI several  
277 chemokines had decreased in magnitude but were significantly elevated when compared to  
278 C57BL/6 WT or mock-infected K18 hACE2 transgenic mice. For some chemokines, such as  
279 RANTES/CCL5, the high levels detected in the lung at 2-DPI were sustained at 4-DPI (**Fig 2A**).  
280 Chemokine levels in the lungs of C57BL/6 WT mice did not increase in response to SARS-CoV-  
281 2 infection at either time point tested. A chemokine storm has been described in humans with

282 COVID-19 disease, and it has been associated with development of acute respiratory distress  
283 syndrome (ARDS) in mice.<sup>22</sup>

284

285 As a measure of systemic inflammation, we determined chemokine levels in the spleen, where  
286 MIP-2/CXCL2, IP-10/CXCL10, MIP-1 $\alpha$ /CCL3, and MIP-1 $\beta$ /CCL4 were significantly increased at  
287 2-DPI (**Fig 2B**). Only MIP-1 $\alpha$ /CCL3 and MIP-1 $\beta$ /CCL4 maintained a significant increase at 4-DPI  
288 when compared to both mock-infected K18 hACE2 transgenic mice and WT-infected C57BL/6  
289 mice. Contrary to the lung, we did not observe an increase in RANTES/CCL5 relative to virus-  
290 infected C57BL/6 WT or mock-infected K18 hACE2 transgenic mice (**Fig 2B**), identifying a  
291 potential sustained lung-specific chemokine response after SARS-CoV-2 infection. Our results  
292 indicate that SARS-CoV-2 infection of K18 hACE2 transgenic mice triggers both a local (lung)  
293 and systemic (spleen) chemokine storm. Chemokine analysis in nasal turbinate supported the  
294 early chemokine storm at 2-DPI in SARS-CoV-2 infected K18 hACE2 transgenic mice, with  
295 significant but transient high levels of MCP-1/CCL2, MIP-1 $\alpha$ /CCL3, RANTES/CCL5 and IP-  
296 10/CXCL10 (**Fig S3A**). No differences were observed in the trachea (**Fig S3B**). Interestingly, the  
297 brain of SARS-CoV-2 infected K18 hACE2 transgenic mice also had significant levels of MIP-  
298 2/CXCL2, IP-10/CXCL10 and MIP-1 $\alpha$ /CCL3 but in contrast to other organs, these were detectable  
299 only at 4-DPI (**Fig 2C**), similar to the detection of virus in brain. There were no differences in  
300 chemokine levels in the lung between male and female K18 hACE2 transgenic infected mice, with  
301 the exception of IP-10/CXCL10 at 2-DPI, which was significantly higher in female K18 hACE2  
302 transgenic mice (**Fig S5A**).

303

### 304 **SARS-CoV-2 infection of K18 hACE2 transgenic mice drives a local cytokine storm**

305 We next determined if SARS-CoV-2 infection of K18 hACE2 transgenic mice resulted in a cytokine  
306 storm, as described during the development of severe COVID-19 disease in humans (reviewed

307 in <sup>22-26</sup>). Multiple tissues were analyzed to define local and systemic inflammatory, TH1, TH17,  
308 and TH2 responses. At 2-DPI the cytokine profile in the lungs of K18 hACE2 transgenic mice  
309 included a mixed inflammatory (TNF, IL-6, IFN- $\alpha$ , and IFN- $\lambda$ ), TH1 (IL-12, IFN- $\gamma$ ), TH17 (IL-17, IL-  
310 27) and TH2 (IL-4, IL-10) profile (**Fig 3A**). Notably, IL-1 $\beta$  production was absent at 2- and 4-DPI.  
311 Reports in humans with COVID-19 showed that IL-1 precedes other cytokine production <sup>26,27</sup>  
312 Thus, studying earlier time points may have been informative in this mouse model with regard to  
313 IL-1 $\beta$  production.

314  
315 Similar to that observed for chemokines, the cytokine storm resolved by 4-DPI with the exception  
316 of TNF and the type I and III IFNs which remained significantly increased when compared to  
317 SARS-CoV-2 infected C57BL/6 WT or mock-infected K18 hACE2 transgenic mice (**Fig 3A**).  
318 Reduction of chemokines and cytokines occurred despite increasing viral loads and extensive  
319 weight loss in virus-infected K18 hACE2 transgenic mice. No significant sex differences were  
320 found for cytokine levels in the lung (data not shown).

321  
322 With few exceptions, the cytokine storm was absent in the spleen (**Fig 3B**), nasal turbinate (**Fig**  
323 **S4A**), and trachea (**Fig S4B**) of SARS-CoV-2 infected K18 hACE2 transgenic mice, indicating  
324 that the cytokine response was relatively localized to the lung. Exceptions included an increase  
325 in TNF at 2-DPI in the spleen (**Fig 3B**), and a moderate but significant increase in IL-10 in the  
326 nasal turbinate at 2-DPI (**Fig S4A**). Interestingly, although we observed decreased cytokines in  
327 the lung by 4-DPI, some TH1 and TH17 cytokines (**Fig 3C**) and chemokines (**Fig 2C**) increased  
328 in the brain at this same time-point, suggesting a delayed viral spread to the brain. IL-1 $\beta$ , IL-27,  
329 IL-4, IL-13 and IL-10 were also elevated in the brain of C57BL/6 WT mice infected with SARS-  
330 CoV-2, even in the absence of detectable virus in any organs. IFN- $\alpha$  (type I) was not detected in  
331 the brain of SARS-CoV-2-infected K18 hACE2 transgenic or WT C57BL/6 mice. However, both

332 IFN- $\gamma$  (type II) and IFN- $\lambda$  (type III) were lower in K18 hACE2 transgenic mice relative to WT  
333 C57BL/6 mice infected with SARS-CoV-2, and similar to mock-infected K18 hACE2 transgenic  
334 mice (**Fig 3C**).

335  
336 A clear sex difference was observed in the brain. Males had significantly higher TH1 and TH17  
337 cytokine responses at 4-DPI compared to SARS-CoV-2 infected female K18 hACE2 transgenic  
338 mice, and female mice had significantly higher TH2 responses when compared to male K18  
339 hACE2 transgenic mice at the same time point (**Fig S5B**). These sex differences are similar to  
340 studies of acute LPS-induced inflammation.<sup>28,29</sup> The TH1/TH2 sex difference was not observed in  
341 C57BL/6 WT mice infected with SARS-CoV-2 (**Fig S5B**).

342  
343 We further assessed correlations between viral titers, chemokines and cytokines observed in  
344 each tissue, and performed hierarchical clustering to identify the immune response characteristics  
345 in response to SARS-CoV-2 infection in K18 hACE2 transgenic mice (**Figs 4A-C and Figs S6A,**  
346 **B**). At 2-DPI in the lungs of SARS-CoV-2 infected K18 hACE2 transgenic mice we observed two  
347 distinct clusters (**Fig 4A**): A cytokine cluster defined by the presence of IL-10 (Cluster-1, **Fig 4A**),  
348 which correlated with the presence of IL-4 (0.94), IL-6 (0.91), IL-13 (0.91) and IL-12p70 (0.86);  
349 and a chemokine cluster (Cluster-2, **Fig 4A**) defined by MCP-1/CCL2 and correlating with the  
350 presence of MIP-1 $\beta$ /CCL4 (0.99), MIP-2/CXCL2 (0.95) and MIP-1 $\alpha$ /CCL3 (0.93), and cytokines  
351 TNF (0.95) and IFN- $\gamma$  (0.93). Lung viral loads did not correlate with the presence of any specific  
352 cytokine or chemokine, possibly due to the variability seen for viral loads and a quickly progressing  
353 disease. The 2-DPI correlative clusters in the lung were not maintained at 4-DPI but other smaller  
354 clusters were observed, the largest being led by IL-13 (Cluster-3, **Fig 4A**) correlating with IL1- $\beta$   
355 (0.97) and IL-4 (0.93), suggestive of a rapidly developing immune response similar in nature, but  
356 not form, to the cytokine storm observed in humans.<sup>22-26</sup>

357 The IL-10 cluster (Cluster-1) was also observed in the spleen at 2-DPI, correlating with IL-6 (0.96),  
358 IL-4 (0.95), IL-13 (0.93) and IL-1 $\beta$  (0.88); and at 4-DPI, correlating with IL-13 (0.92), IL-4 (0.89)  
359 and IL-1 $\beta$  (0.76)] (**Fig 4B**), but not in the brain (**Fig 4C**). Indeed, in the brain a correlation between  
360 IL-2, IL-4 and IL-13 was observed independent of IL-10 at 2-DPI (Cluster-4, **Fig 4C**). In the brain,  
361 a larger cluster (Cluster 5) was observed at 4-DPI, driven by RANTES/CCL5 and correlating with  
362 all MCP-1/CCL2, MIP-1 $\alpha$ /CCL3, TNF (0.99) and IL-6 (0.98) (**Fig 4C**). Nasal turbinate and trachea  
363 did not have significantly elevated levels of cytokines and chemokines (**Fig S6 A, B**).

364  
365 When analyzed by sex, Cluster-1 (**Fig 4A**) had perfect correlations in males at 2-DPI but these  
366 correlations were absent in females with the exception of the IL-4 correlation with IL-10 (0.95)  
367 (**Fig S7A**). Cluster-2 in males at 2-DPI did not extend to 4-DPI for either sex (**Fig S7B**). Indeed,  
368 at 4-DPI in males, a new Cluster-9 with correlations between TNF, MCP-1/CCL2 and MIP-  
369 1 $\alpha$ /CCL3 together with IL-12p70 and MIP-2/CXCL2 was observed (**Fig S7B**).

370  
371 In the brain, RANTES/CCL5, MIP-1 $\alpha$ /CCL3 and IL-10 correlated with SARS-CoV-2 viral load in  
372 the nasal turbinate at 2-DPI only in males (**Fig S7C**). This correlation disappeared at 4-DPI but a  
373 correlation between SARS-CoV-2 viral load and IL-10 in the brain was then observed (**Fig S7D**).  
374 Conversely, SARS-CoV-2 viral load in the brain positively correlated with the presence of  
375 chemoattractants [MIP-2/CXCL2, IP-10/CXCL10, MCP-1/CCL2 and MIP-1 $\alpha$ /CCL3] in females  
376 (**Fig S7D**). All correlated with the presence of RANTES/CCL5 and TNF in the brain, as well as  
377 with SARS-CoV-2 viral titers in nasal turbinate (**Fig S7D**).

378

379

380

381 **SARS-CoV-2 infected K18 hACE2 transgenic mice develop rhinitis, pneumonia with**  
382 **associated pulmonary inflammation**

383 WT C57BL/6 mice developed minimal mononuclear and neutrophilic interstitial pneumonia (lung)  
384 (**Figs 5A, B, bracket**) and rhinitis (nasal turbinate) (data not shown) that dissipated by 4-DPI  
385 (**Figs 5C, D**), with very few consistent changes in other tissues with the exception of lymphocyte  
386 aggregates in the lamina propria of the small intestine (**Fig 5I, asterisk**) and few small aggregates  
387 of mixed mononuclear inflammation with few neutrophils occasionally admixed with individual  
388 hepatocellular necrosis (**Fig 5J, arrowhead**). Minimal alveolar histiocytosis (**Fig 5D, asterisk**),  
389 pneumocyte type II cells (**Fig 5D, arrowheads**), perivascular mononuclear inflammation (**Fig 5D,**  
390 **bracket**) and rhinitis with low numbers of neutrophils (**Fig 5K, arrowhead**) were variably  
391 observed in 4-DPI WT C57BL/6 mice (**Fig 5D**). Brain tissue from SARS-CoV-2-infected C57BL/6  
392 WT mice 4-DPI was normal (**Fig 5L**). Thus, WT C57BL/6 mice had minimal to no pathologic  
393 findings consistent with their undetectable viral loads.

394  
395 K18 hACE2 transgenic mice developed rhinitis (data not shown), and interstitial pneumonia (**Figs**  
396 **5E, F**) associated with alveolar histiocytosis admixed neutrophils and lymphocytes (**Fig 5F,**  
397 **asterisks**), mild type II pneumocyte hyperplasia (**Fig 5F, arrowhead**), bronchiolar syncytia (**Fig**  
398 **5F, arrow**), endothelial cell hyperplasia and vasculitis (**Fig 5F, bracket**) by 2-DPI. Mice showed  
399 evidence of liver inflammation, although mixed inflammatory aggregates were minimal with  
400 variable amounts of individual hepatocellular necrosis (**Fig 5N, arrowhead**), as well as gut  
401 associated lymphoid tissue (GALT) with prominent centers (**Fig 5M, asterisk**). By 4-DPI, the  
402 majority of K18 hACE2 transgenic mice had 25% or greater lung involvement indicative of  
403 pneumonia (**Fig 5G**), with affected areas presenting with inflammatory cellular accumulations and  
404 hemorrhage in alveolar spaces (**Fig 5H, asterisk**) and interstitium (**Fig 5H, bracket**), intra-  
405 alveolar fibrin admixed cellular debris (**Fig 5H, arrow**), vasculitis (**Fig 5H, bracket**), edema (**Fig**  
406 **5H, arrowhead**), and neutrophilic rhinitis (**Fig 5O, bracket**). By 4-DPI, K18 hACE2 transgenic



407 mice had inflammation in the liver (not shown), and lymphocyte and neutrophil aggregates in the  
408 small intestine (not shown). Two K18 hACE2 transgenic mice had evidence of cerebral pathology;  
409 one animal had perivascular hemorrhage (not shown) and another animal had mild  
410 meningoencephalitis with vasculitis (**Fig 5P, arrowhead**).

411

412 **SARS-CoV-2 NP and hACE2 expression in tissues of SARS-CoV-2 infected K18 hACE2**  
413 **transgenic mice**

414 Immunohistochemistry (IHC) labeling for SARS-CoV-2 NP antigen showed a heterogeneous  
415 distribution of viral NP in the lungs of K18 hACE2 transgenic mice; however, this distribution was  
416 more focalized in the nasal turbinate (**Fig 6A**). Virus NP antigen was undetectable in all organs  
417 from C57BL/6 WT-infected mice (**Fig 6A**). Distribution of the hACE2 receptor by IHC was obvious  
418 in the lungs and in the epithelium of the nasal turbinate of K18 hACE2 transgenic mice (**Fig 6A**)  
419 and, as expected, absent from C57BL/6 WT mice (**Fig 6A**). Viral NP antigen did not co-localize  
420 in the same regions as hACE2 except in the lung (**Fig. 6A** and data not shown) perhaps because  
421 necropsies were first performed at 2-DPI. hACE2 was also highly expressed in the choroid plexus  
422 and some cells were also positive for SARS-CoV-2 NP (**Fig 6B**). This result opens the possibility  
423 that the cerebral spinal fluid (CSF) produced by the choroid plexus, could carry the virus into the  
424 central nervous system, disseminating SARS-CoV-2 through the body to the points of CSF  
425 reabsorption.

426

427

428

429

430

431

432

## 433 **DISCUSSION**

434 Herein we demonstrate that K18 hACE2 transgenic mice are highly susceptible to SARS-CoV-2  
435 infection, quickly reaching study endpoints by 6-DPI following i.n. infection with  $10^5$  PFU. SARS-  
436 CoV-2 was detected in the nasal turbinate and lung of K18 hACE2 transgenic mice on 2- and 4-  
437 DPI, and in the brain at 4-DPI. The existence of SARS-CoV-2 in the lung, nasal turbinate and  
438 brain of SARS-CoV-2-infected hACE2 transgenic mice was verified by the presence of NP antigen  
439 using IHC, although NP antigen did not generally co-localize with hACE2 protein expression  
440 except in lungs, perhaps because SARS-CoV-2 had already entered the epithelium of the nasal  
441 turbinate and other tissues by 2-DPI. K18 hACE2 transgenic mice developed progressive  
442 pneumonia and by 4-DPI there was evidence of intra-alveolar fibrin, cellular debris, vasculitis and  
443 edema in the lung, likely driving morbidity and mortality. SARS-CoV-2 infection of K18 hACE2  
444 transgenic mice was also associated by a marked significant increase in chemokine and cytokine  
445 production in the lung and spleen by 2-DPI. Although most chemokines and cytokines expression  
446 levels were reduced by 4-DPI, MCP-1/CCL2 and IFN- $\lambda$  remained elevated in the lung and virus  
447 persisted.

448

449 An important distinction between our study and others is that K18 hACE2 transgenic mice  
450 succumbed to SARS-CoV-2 infection by 6-DPI when infected at  $10^5$  PFUs. This phenotype has  
451 not been reported in any other mouse studies of SARS-CoV-2 infection,<sup>12-19</sup> including a study  
452 using  $\sim 10^5$  PFU (i.n.) of the Hong Kong/VM20001061/2020 SARS-CoV-2 strain.<sup>12</sup> K18 hACE2  
453 transgenic mice express the hACE2 protein under the human K18 promoter, which induces high  
454 transgene expression specifically in airway epithelial cells.<sup>11,30</sup> The K18 hACE2 transgenic mice  
455 contain 2.5 kb of the K18 genomic sequence, including the promoter, first intron, and a  
456 translational enhancer (TE) sequence from alfalfa mosaic virus upstream of hACE2, followed by  
457 exons 6-7 and the poly(A) signal of the human K18 gene. This complete 2.5 kb K18 genomic

458 sequence is necessary for the K18 hACE2 transgene expression in lung airway epithelium, and  
459 other organs such as the liver, kidney and gastrointestinal tract.<sup>11,31</sup> This contrasts with mice  
460 expressing hACE2 under the mouse ACE2 promoter.<sup>14,16,19,32</sup> Thus, a potential difference in  
461 results between our study and others is the high expression levels of hACE2 in the airway epithelia  
462 in the K18 hACE2 transgenic mouse model used in this study. This concept is further supported  
463 by our IHC data showing higher levels of hACE2 expression in the airway epithelium (nasal  
464 turbinate and lung, **Fig 6**) in K18 hACE2 transgenic mice. Of interest, other studies infected the  
465 K18 hACE2 transgenic mice with a lower MOI ( $10^4$  PFUs) than used in this present study, wherein  
466 the majority of mice showed morbidity by 7-DPI but not mortality.<sup>12,13</sup> However, when K18 hACE2  
467 transgenic mice were infected with  $10^5$  PFU in those studies, they developed progressive weight  
468 loss and lung pathologies at 2-DPI and central nervous system (CNS) involvement by 6-DPI, 2-  
469 days later than our observations (<sup>31</sup>, *Perlman S, McCray, personal communication, June 2020*).  
470 Thus, in addition to the presence of hACE2 on the upper and lower respiratory tract epithelium  
471 for establishing SARS-CoV-2 infection in K18 hACE2 transgenic mice, it appears that the number  
472 of viral particles during the initial exposure is also a critical determinant of developing severe  
473 COVID-19 morbidity and mortality in this model, similar to the situation with other respiratory viral  
474 infections (e.g. influenza).<sup>33</sup>

475  
476 The term cytokine storm was first used during avian H5N1 and 1918 influenza virus infections, for  
477 SARS-CoV-1 and, more recently, for SARS-CoV-2.<sup>27,34-36</sup> In K18 hACE2 transgenic mice, we  
478 observed correlations between cytokines, the presence of virus, SARS-CoV-2 NP antigen, and  
479 pathogenesis (histopathology). As observed in our study, as well as reported in mice expressing  
480 hACE2 under a mouse or adenovirus promoter,<sup>12-19</sup> it appears that the magnitude of cytokine and  
481 chemokine responses during SARS-CoV-2 infection is another important determinant of disease  
482 severity and this result may be applicable to predicting a person's clinical outcome after SARS-  
483 CoV-2 infection [asymptomatic, mild COVID-19 or severe COVID-19 Acute Respiratory Distress

484 Syndrome (CARDS)]. K18 hACE2 transgenic mice expressed an early (2-DPI) and mixed  
485 cytokine profile that included pro-inflammatory, TH1, TH2 and TH17 cytokines indicative of  
486 cytokine dysregulation in the lungs. This cytokine storm resolved by 4-DPI, even though mice  
487 were reaching a moribund state, with the exception of TNF and the type I and III IFNs which  
488 remained significantly increased. These results suggest that TNF and type I and III IFN's may be  
489 important drivers of disease progression.

490  
491 While the amount of chemokines decreased at 4-DPI, MCP-1/CCL2 remained elevated indicative  
492 of ongoing tissue damage and cellular recruitment. MCP-1/CCL2 and IP-10/CXCL10 were  
493 produced at high levels in K18 hACE2 transgenic mice after SARS-CoV-2 infection, both, locally  
494 and systematically at 2-DPI, as well as in the brain at 4-DPI. Elevated MCP-1/CCL2 and IP-  
495 10/CXCL10 likely explained the accumulation of inflammatory cells in the lung including the  
496 observed neutrophils and monocytes (**Table 1**), and development of vasculitis that likely  
497 contributed to morbidity and mortality. In this context, gene expression signatures in the lungs of  
498 SARS-CoV-2-infected patients who succumb to viral infection showed high expression of MCP-  
499 1/CCL2 and IP-10/CXCL10, which was linked to type I and II IFN responses.<sup>34,37</sup> Early reports  
500 from COVID-19 patients also indicates that chemokines are elevated<sup>27</sup> and MCP-1/CCL2 and IP-  
501 10/CXCL10 have been implicated in COVID-19 patients,<sup>27</sup> demonstrating that K18 hACE2  
502 transgenic mice replicate cytokine and chemokine storm traits observed in humans.

503  
504 The consequences of reduced cytokine production at 4-DPI is unknown but we can speculate on  
505 several modes of action. This process could be driven by accumulation of lymphoid tissue around  
506 the airways, which dampens initial responses in severe influenza virus infection.<sup>38</sup> Alternatively,  
507 there may be a reestablishment of the balance between pro-inflammatory cytokines and their  
508 soluble receptors or inhibitors in the alveolar compartment.<sup>39</sup> The production of TH2 cytokines  
509 also represents another mechanism involved in regulating pro-inflammatory responses. The

510 observed production of IL-10, although commonly recognized as an anti-inflammatory cytokine,  
511 plays a role in fibrosis, inducing collagen production and fibrocyte recruitment into the lung.<sup>34,40</sup> In  
512 this context, several correlative cytokine clusters linked by IL-10 were observed in multiple organs  
513 including the lungs and the brain. Elevated IL-10 can be associated with immune paralysis,<sup>34</sup>  
514 altering the function of neutrophils and monocytes reaching the local infection site, potentially  
515 driving the expansion of the SARS-CoV-2 infection in the K18 hACE2 transgenic mouse model.  
516 Alternatively, the high levels of IL-6 observed in tissues may provide a mechanism for enhancing  
517 TNF activity during acute viral infection,<sup>39</sup> as well as B cell antibody production and fibrosis.<sup>41</sup>  
518 Thus it is conceivable that if one or more of these regulatory mechanisms are aberrantly regulated  
519 or absent, the pro- and anti-inflammatory balance critical for lung immune homeostasis might be  
520 disrupted, contributing to the cytokine storm observed in the K18 hACE2 transgenic mouse model  
521 upon SARS-CoV-2 infection. Interestingly, IL-4/IL-13 activation of the STAT-6 signaling pathway  
522 is associated with some lung pathologies including asthma.<sup>42,43</sup> The IL-6/IL-10/IL-13 correlation  
523 has also been described in patients with viral infections, where their expression levels in serum  
524 correlates with the disease clinical state,<sup>44</sup> as well as to aortic aneurysm.<sup>45</sup> Indeed, influenza  
525 infection is related to heart pathologies.<sup>46</sup>

526

527 Although SARS-CoV-2 was detected in the brain at 4-DPI, minimal histopathological changes  
528 were observed for the majority of mice, except for two mice that presented with multifocal  
529 perivascular neutrophils, lymphocytes, microglial cells and necrotic debris, vasculitis, and  
530 inflammation that extended to the meninges with hemorrhage. Brain cytokine responses were  
531 dominated by TH2 cytokines (IL-4, IL-13, IL-10, IL-27, and IL-33) which may reflect the natural  
532 TH2 status of the brain.<sup>47,48</sup> IL-27 is known to regulate inflammation in the CNS through  
533 upregulation of IL-10,<sup>49-51</sup> but can also potentiate inflammation through induction of IL-12.<sup>52</sup> The  
534 cytokine profiles observed in SARS-CoV-2 infected mice suggest it is the former response at play,  
535 working to counterbalance the potent peripheral TH1 responses. We also observed increases in

536 cytokine production at 2- and 4-DPI that included a robust IL-1 $\beta$  response. The detection of IL-1 $\beta$   
537 in brain at 2-DPI suggests that virus spread to brain was delayed relative to lung and spleen <sup>27</sup>.  
538 Interferon type II and III were significantly lower in the brain of SARS-CoV-2 infected K18 hACE2  
539 transgenic mice when compared to WT C57BL/6 mice at all-time points studied, and interferon  
540 type I was not detected, which could be a deciding factor driving colonization of the brain by  
541 SARS-CoV-2 in this mouse model. Indeed, deviation from homeostatic IFN type I/IFN type II  
542 balance contributes to insufficient immune surveillance of the CNS and loss of immune-dependent  
543 protection, or immune-mediated destruction.<sup>53</sup>

544  
545 Most intriguing was that many TH2 cytokines (IL-1 $\beta$ , IL-27, IL-4, IL-13, IL-33 and IL-10) were also  
546 elevated in the brain of WT C57BL/6 control mice at 2- and 4-DPI. Although we did not find any  
547 virus in WT C57BL/6 mice, it suggests that the virus might be privy to the blood brain barrier  
548 because the cytokine pattern in the brain was similar to K18 hACE2 transgenic mice. C57BL/6  
549 mice express the mouse ACE2 protein and studies have shown that ACE2 gene-disrupted mice  
550 are less susceptible to SARS-CoV-1.<sup>54</sup> Therefore, it is possible that endogenous ACE2 in mice  
551 could drive a cytokine response in the brain of WT C57BL/6 mice infected with SARS-CoV-2 while  
552 showing very limited peripheral responses. Overall, these data suggest that there may be some  
553 tropism for SARS-CoV-2 in the brain of WT mice, supporting some reports of neurological issues  
554 in humans with COVID-19.<sup>55</sup> We also observed sex differences in K18 hACE2 transgenic mice  
555 with males exhibiting a TH1 and TH17 phenotype at 4-DPI whereas female K18 hACE2  
556 transgenic mice had a TH2 responses at the same time point, similar to studies of acute LPS-  
557 induced inflammation,<sup>28,29</sup> which suggests that males may be more prone to exhibit neurological  
558 problems during SARS-CoV-2 infection, independent of viral load.

559

560 While our findings clearly identify the K18 hACE2 transgenic mouse as a model for SARS-CoV-2  
561 infection and COVID-19 disease, our studies have some limitations. The primary limitation was  
562 the number of mice that were available for study, due to limited supply from the vendor. We  
563 maximized our studies by performing two independent experiments that cross-validated each  
564 other in survival and pathogenesis results. Both studies showed considerable sensitivity of K18  
565 hACE2 transgenic mice to SARS-CoV-2 infection. We chose a relatively high viral dose (MOI  
566  $1 \times 10^5$  PFU/mouse) that was capable of causing extensive disease, but we were unable to include  
567 additional time points to further understand the time course of immune responses (e.g. 1-DPI) or  
568 whether the chemokine and cytokine storm increased again at study endpoints (e.g. 5/6-DPI).  
569 Likewise, the limited number of K18 hACE2 transgenic mice did not allow us to use different viral  
570 doses to calculate the mouse lethal dose 50 (MLD<sub>50</sub>) of SARS-CoV-2. Inclusion of WT C57BL/6  
571 control mice in our studies confirmed that mice are not naturally susceptible to infection with  
572 SARS-CoV-2 without experimental manipulation to express hACE2, further confirming that  
573 hACE2 is the receptor for SARS-CoV-2.<sup>56-59</sup>

574  
575 Several groups are developing large animal models of SARS-CoV-2 infection and COVID-19, with  
576 a primary focus on nonhuman primates (NHP) models. Reports indicate that macaques develop  
577 self-limiting disease with a strong anamnestic responses (innate and adaptive)<sup>60-62</sup>, while vervets  
578 may model signs of acute respiratory distress.<sup>63</sup> These models are necessary for preclinical  
579 testing for safety, immunogenicity and efficacy of vaccines and therapeutics. However, no NHP  
580 models display the end-stage COVID-19 outcomes that are effectively captured in the K18 ACE2  
581 transgenic mice. Hence, evaluation of therapeutics and antivirals must also leverage transgenic  
582 murine models of end-stage lethal COVID-19 disease, characterized by ARDS. The K18 hACE2  
583 mouse model can work in concert with other rodent models, such as the Golden Syrian hamster  
584 model,<sup>64-66</sup> to provide two-step testing of therapeutics. This would fill a critical gap and relieve the  
585 pressure on the limit number of NHPs available for this purpose worldwide. Moreover, the K18

586 hACE2 mouse model could also be used to assess the contribution of host cellular factors in  
587 SARS-CoV-2 infection or associated COVID-19 disease, for example through crossing K18  
588 hACE2 mice with IFNAR KO mice to assess the contribution of type I IFN in SARS-CoV2  
589 infection.<sup>67,68</sup>

590

591 Altogether, our study defines the K18 hACE2 transgenic mouse as an important small animal  
592 model to evaluate SARS-CoV-2 pathogenicity and to assess protection efficacy of prophylactic  
593 (vaccines) and therapeutic (antivirals) approaches against SARS-CoV-2 infection with specific  
594 readouts such as morbidity, mortality, cytokine and chemokine storms, histopathology, and viral  
595 replication.

596

## 597 **ACKNOWLEDGMENTS**

598 We would like to thank all members of Texas Biomedical Research Institute for their efforts in  
599 keeping the institute fully operational during the COVID-19 pandemic, making this study possible.

600 We would also like to thank the support of Texas Biomed donors, whose COVID-19 philanthropic  
601 donations made possible the realization of this study. We thank Dr. Abul Azad for his assistance  
602 with editing. Finally, we would also like to thank The Jackson Laboratory, especially Drs. Cat Lutz  
603 and Steve Rockwood, for providing us with K18 hACE2 transgenic mice to conduct this study;  
604 and the Texas Biomed IACUC and BSC committees and EHS for their attention to review our  
605 protocols in a time efficient manner to facilitate rapid sharing of our data with the scientific  
606 community. We would like to dedicate this manuscript to all COVID-19 victims and to all heroes  
607 battling this disease.

608

609

610

611



612 **CONFLICT OF INTEREST**

613 Authors declare not conflict of interest.

614

615 **AUTHORS CONTRIBUTIONS**

616 Planned, executed studies and data analyses (FSO, J-GP, PPT, OG, AA, AAG, AOF, SG, AGV,  
617 CY, KC, CH, VDLP, LMP , KJA, HMS, AS, JIG, AW, RNP, MG, JM, CC, SE, OHR, SDM, KNK,  
618 RE, SHU, XA, JT, LMS and JBT); Edited the manuscript (OG, CRAH, C-Christi, JLP, TA, RCJr,  
619 LDG, EJDJr, DK, and LSS); Wrote the manuscript (JT, LMS and JBT).

620

621

622

623

624

625

626

627

628

629

630

631

632

633

634

635

636

**Table 1. Histopathology evaluation of SARS-CoV-2 infected WT and K18 hACE2 transgenic C57BL/6 mice.** F: female. M: Male. When not indicated, observed in the majority of females and males.

| GROUP             | DAY 2                                                                                                                                                                                                                                                                                                                                                                                                                                                                                                                                       |                                                                                                                                                                                                                                                                                                                                                                                                                                                                                                                                                                                                                                                                                                                                                     | DAY 4                                                                                                                                                                                                                                                                                                                                                                                                                                                                                                                                                                                                                                                                      |                                                                                                                                                                                                                                                                                                                                                                                                                                                                                                                                                                                                                 |
|-------------------|---------------------------------------------------------------------------------------------------------------------------------------------------------------------------------------------------------------------------------------------------------------------------------------------------------------------------------------------------------------------------------------------------------------------------------------------------------------------------------------------------------------------------------------------|-----------------------------------------------------------------------------------------------------------------------------------------------------------------------------------------------------------------------------------------------------------------------------------------------------------------------------------------------------------------------------------------------------------------------------------------------------------------------------------------------------------------------------------------------------------------------------------------------------------------------------------------------------------------------------------------------------------------------------------------------------|----------------------------------------------------------------------------------------------------------------------------------------------------------------------------------------------------------------------------------------------------------------------------------------------------------------------------------------------------------------------------------------------------------------------------------------------------------------------------------------------------------------------------------------------------------------------------------------------------------------------------------------------------------------------------|-----------------------------------------------------------------------------------------------------------------------------------------------------------------------------------------------------------------------------------------------------------------------------------------------------------------------------------------------------------------------------------------------------------------------------------------------------------------------------------------------------------------------------------------------------------------------------------------------------------------|
|                   | Lung                                                                                                                                                                                                                                                                                                                                                                                                                                                                                                                                        | Other                                                                                                                                                                                                                                                                                                                                                                                                                                                                                                                                                                                                                                                                                                                                               | Lung                                                                                                                                                                                                                                                                                                                                                                                                                                                                                                                                                                                                                                                                       | Other                                                                                                                                                                                                                                                                                                                                                                                                                                                                                                                                                                                                           |
| <b>C57BL/6 WT</b> | <ul style="list-style-type: none"> <li>▪ Minimal or mild multifocal random areas of interstitial thickening with mixed mononuclear cells and neutrophils and minimal intra-alveolar hemorrhage (4 F).</li> <li>▪ Rare vasculitis (1 F)</li> <li>▪ Multiple yet minimal perivascular mononuclear cells, low neutrophil numbers.</li> <li>▪ Rare or few bronchiolar syncytia. (2 F/2 M)</li> <li>▪ Focal minimal aggregates of histiocytes. Focal accumulation of amorphous eosinophilic material in alveolar space (fibrin) (1M).</li> </ul> | <p><b>Nasal cavity:</b> Minimal to mild neutrophil infiltration in (1 F/1 M).</p> <p><b>Liver:</b> Minimal random multifocal aggregates of histiocytes, lymphocytes and few neutrophils. Rare necrotic hepatocytes within hepatic lobule (4 F/3 M)</p> <p><b>Small and large intestine:</b> Small focal aggregates of lymphocytes and rare scattered neutrophils in lamina propria (Gut-associated lymphoid tissue, GALT). (2 F)</p> <p><b>Kidney:</b> Focal small aggregate of neutrophils and histiocytes in interstitium of peri-renal adipose tissue, and medullary interstitium. Eosinophilic material in few glomeruli urinary spaces (1 M)</p> <p><b>Heart:</b> Small lymphoid aggregates within adipose tissue surrounding artery (1 F)</p> | <ul style="list-style-type: none"> <li>▪ Minimal perivascular and interstitial involvement.</li> <li>▪ Few neutrophils seen admixed with mononuclear inflammatory sites.</li> <li>▪ Occasional alveolar epithelial type II cells in areas of alveolar wall septal inflammation (4 F/2 M)</li> <li>▪ Rare vasculitis (1F)</li> <li>▪ Few bronchiole syncytia (4 F/1 M).</li> </ul>                                                                                                                                                                                                                                                                                          | <p><b>Nasal cavity:</b> In the majority, minimal or no changes. Large focal aggregate of lymphocytes and neutrophils in submucosa (1 F).</p> <p><b>Liver:</b> Minimal to mild random multifocal aggregates of histiocytes, lymphocytes and few neutrophils. Rare necrotic hepatocytes within hepatic lobule (3 F/3 M)</p> <p><b>Small and large intestine:</b> Multifocal minimal aggregates of lymphocytes within the lamina propria (GALT) (2 F/2 M).</p>                                                                                                                                                     |
| <b>K18 hACE2</b>  | <ul style="list-style-type: none"> <li>▪ Mild or moderate mononuclear and neutrophilic inflammation admixed with necrotic cell debris.</li> <li>▪ Predominant perivascular pattern expanding into alveolar septa.</li> <li>▪ Mild to moderate alveolar histiocytosis.</li> <li>▪ Mild alveolar epithelial cell type II hyperplasia.</li> <li>▪ Bronchiolar syncytia</li> <li>▪ Endothelial syncytia and vasculitis.</li> <li>▪ Focal evidence of aspiration pneumonia.</li> </ul>                                                           | <p><b>Nasal cavity:</b> Few neutrophils within submucosa. Some lymphocyte, rare neutrophils (1 F/2 M).</p> <p><b>Liver:</b> Minimal multifocal small aggregates of lymphocytes, histiocytes, neutrophils in hepatic cords (4 F/2 M).</p> <p><b>Small/Large intestine:</b> Focal large/small lymphoid aggregates (GALT) (2 F/2 M). Few neutrophils in lamina propria (1 M).</p> <p><b>Kidney:</b> Few focal areas of interstitial lymphocytes in deep cortex (1 F). Regional cystic dilation of renal pelvis (1 M).</p>                                                                                                                                                                                                                              | <ul style="list-style-type: none"> <li>▪ 25% or less (4 F/2 M) or &gt;25% (2 M) of lung with dense mild to moderate mixed inflammatory infiltrate (macrophages, neutrophils) (3 F).</li> <li>▪ Regional consolidation mixed with necrotic debris.</li> <li>▪ Occasional intra-alveolar and perivascular hemorrhage.</li> <li>▪ Mild to moderate mixed mononuclear and neutrophilic inflammation.</li> <li>▪ Predominant interstitial, intra-alveolar and perivascular patterns of mixed inflammation.</li> <li>▪ Multifocal involvement of peribronchiolar, bronchiolar, and pleura in more severely affected areas.</li> <li>▪ Mild to moderate histiocytosis.</li> </ul> | <p><b>Nasal cavity:</b> Few foci of neutrophils, few lymphocytes (3 M). Low numbers of submucosal lymphocyte and plasma cell (1 M).</p> <p><b>Liver:</b> Few focal aggregates of neutrophils, histiocytes, and lymphocytes (2 F/4 M).</p> <p><b>Small and large intestine:</b> Focal small aggregate of lymphocytes or neutrophils in lamina propria (3 F/2 M).</p> <p><b>Brain:</b> Multifocal perivascular hemorrhage (1 F). Multifocal perivascular lymphocytes, rare neutrophils, reactive microglial cells, neuronal necrosis and necrotic debris, vasculitis, inflammation extended to meninges (1M).</p> |

|                                                                                                                                                                                                                                                                                                                                                                                                                                                                                                                                                                                                                                                                                                                                                                                                                                                                                                                                                                                                   |  |  |                                                                                                                                                                                                                                                                                                          |  |
|---------------------------------------------------------------------------------------------------------------------------------------------------------------------------------------------------------------------------------------------------------------------------------------------------------------------------------------------------------------------------------------------------------------------------------------------------------------------------------------------------------------------------------------------------------------------------------------------------------------------------------------------------------------------------------------------------------------------------------------------------------------------------------------------------------------------------------------------------------------------------------------------------------------------------------------------------------------------------------------------------|--|--|----------------------------------------------------------------------------------------------------------------------------------------------------------------------------------------------------------------------------------------------------------------------------------------------------------|--|
|                                                                                                                                                                                                                                                                                                                                                                                                                                                                                                                                                                                                                                                                                                                                                                                                                                                                                                                                                                                                   |  |  | <ul style="list-style-type: none"><li>▪ Mild pneumocyte type II hyperplasia.</li><li>▪ Frequent vasculitis and endothelial syncytia.</li><li>▪ Minimal intra-alveolar fibrin. Bronchiolar syncytia present.</li><li>▪ Regional perivascular edema admixed with mononuclear inflammation (1 M).</li></ul> |  |
| <p><b>CONTROLS:</b> WT 57BL/6 and K18 hACE2 transgenic mock infected mice were assessed at the completion of the study, and showed no significant, or mild, microscopic lesions. Specifically, WT C57BL/6 mock infected mice has no significant lesions, with the exception of prominent lymphoid follicles within the lamina propria (GALT) and splenic white pulp (1M), or small lymphocyte aggregates admixed with few neutrophils in the hepatic sinusoids (1F). K18 ACE2 transgenic mock infected mice had minor findings; two small focal perivascular aggregates of lymphocytes, few small lymphocyte aggregates, and focal osseous metaplasia within the pleura; few small aggregates of histiocytes and lymphocytes admixed with few neutrophils within hepatic sinusoids and occasionally in portal triads; prominent lymphoid follicles within gastrointestinal lamina propria (M); and macrophages within the splenic red pulp with minimal yellow intracytoplasmic pigment (1F).</p> |  |  |                                                                                                                                                                                                                                                                                                          |  |

639

640

## 641 REFERENCES

642 1 Hoffmann, M. *et al.* SARS-CoV-2 Cell Entry Depends on ACE2 and TMPRSS2 and Is

643 Blocked by a Clinically Proven Protease Inhibitor. *Cell* **181**, 271-280 e278,

644 doi:10.1016/j.cell.2020.02.052 (2020).

645 2 Lu, R. *et al.* Genomic characterisation and epidemiology of 2019 novel coronavirus:

646 implications for virus origins and receptor binding. *Lancet* **395**, 565-574, doi:10.1016/S0140-

647 6736(20)30251-8 (2020).

648 3 Walls, A. C. *et al.* Structure, Function, and Antigenicity of the SARS-CoV-2 Spike

649 Glycoprotein. *Cell* **181**, 281-292 e286, doi:10.1016/j.cell.2020.02.058 (2020).

650 4 Yan, R. *et al.* Structural basis for the recognition of SARS-CoV-2 by full-length human

651 ACE2. *Science* **367**, 1444-1448, doi:10.1126/science.abb2762 (2020).

652 5 Gheblawi, M. *et al.* Angiotensin-Converting Enzyme 2: SARS-CoV-2 Receptor and

653 Regulator of the Renin-Angiotensin System: Celebrating the 20th Anniversary of the Discovery

654 of ACE2. *Circ Res* **126**, 1456-1474, doi:10.1161/CIRCRESAHA.120.317015 (2020).

- 655 6 Zhou, F. *et al.* Clinical course and risk factors for mortality of adult inpatients with  
656 COVID-19 in Wuhan, China: a retrospective cohort study. *Lancet* **395**, 1054-1062,  
657 doi:10.1016/S0140-6736(20)30566-3 (2020).
- 658 7 Zhang, J. *et al.* Risk factors for disease severity, unimprovement, and mortality in  
659 COVID-19 patients in Wuhan, China. *Clin Microbiol Infect*, doi:10.1016/j.cmi.2020.04.012  
660 (2020).
- 661 8 Li, X. *et al.* Risk factors for severity and mortality in adult COVID-19 inpatients in Wuhan.  
662 *J Allergy Clin Immunol*, doi:10.1016/j.jaci.2020.04.006 (2020).
- 663 9 Gattinoni, L. *et al.* Covid-19 Does Not Lead to a "Typical" Acute Respiratory Distress  
664 Syndrome. *Am J Respir Crit Care Med*, doi:10.1164/rccm.202003-0817LE (2020).
- 665 10 Gattinoni, L., Chiumello, D. & Rossi, S. COVID-19 pneumonia: ARDS or not? *Crit Care*  
666 **24**, 154, doi:10.1186/s13054-020-02880-z (2020).
- 667 11 McCray, P. B., Jr. *et al.* Lethal infection of K18-hACE2 mice infected with severe acute  
668 respiratory syndrome coronavirus. *J Virol* **81**, 813-821, doi:10.1128/JVI.02012-06 (2007).
- 669 12 Moreau, G. B., SK, Sturek, JM; Donlan, AN; Petri, WA Jr.; Mann, BJ. Evaluation of K18-  
670 hACE2 mice as a model of SARS-CoV-2 infection. [https://www.biorxiv.org/content/10.1101/](https://www.biorxiv.org/content/10.1101/2020.06.26.171033v1)  
671 [2020.06.26.171033v1](https://www.biorxiv.org/content/10.1101/2020.06.26.171033v1). *BioRxiv*, doi:<https://doi.org/10.1101/2020.06.26.171033> (2020).
- 672 13 Rathnasinghe, R. S., S; Amanat, F; Gillespie, VL; Krammer, F; Garcia-Sastre, A;  
673 Coughlan, L; Schotsaert, M; Uccellini M. Comparison of Transgenic and Adenovirus hACE2  
674 Mouse Models for SARS-CoV-2 Infection. [https://www.biorxiv.org/content/10.1101/](https://www.biorxiv.org/content/10.1101/2020.07.06.190066v1)  
675 [2020.07.06.190066v1](https://www.biorxiv.org/content/10.1101/2020.07.06.190066v1). *BioRxiv* (2020).
- 676 14 Jiang, R. D. *et al.* Pathogenesis of SARS-CoV-2 in Transgenic Mice Expressing Human  
677 Angiotensin-Converting Enzyme 2. *Cell* **182**, 50-58 e58, doi:10.1016/j.cell.2020.05.027 (2020).
- 678 15 Sun, S.-H., Chen, Q., Gu, H.-J., Yang, G., Wang, Y.-X., Huang, X.-Y., Liu, S.-S., Zhang,  
679 N.-N., Li, X.-F., Xiong, R., Guo, Y., Deng, Y.-Q., Huang, W.-J., Liu, Q., Liu, Q.-M., Shen, Y.-L.,

- 680 Zhou, Y., Yang, X., Zhao, T.-Y., Fan, C.-F., Zhou, Y.-S., Qin, C.-F., Wang, Y.-C. A mouse model  
681 of SARS-CoV-2 infection and pathogenesis. *Cell Host Microbe*, [https://doi.org/10.1016/j.chom.](https://doi.org/10.1016/j.chom.2020.1005.1020)  
682 [2020.1005.1020.](https://doi.org/10.1016/j.chom.2020.05.020), doi:<https://doi.org/10.1016/j.chom.2020.05.020>. (2020).
- 683 16 Bao, L. *et al.* The pathogenicity of SARS-CoV-2 in hACE2 transgenic mice. *Nature*,  
684 doi:[10.1038/s41586-020-2312-y](https://doi.org/10.1038/s41586-020-2312-y) (2020).
- 685 17 Hassan, A. O. *et al.* A SARS-CoV-2 Infection Model in Mice Demonstrates Protection by  
686 Neutralizing Antibodies. *Cell*, doi:[10.1016/j.cell.2020.06.011](https://doi.org/10.1016/j.cell.2020.06.011) (2020).
- 687 18 Israelow, B. *et al.* Mouse model of SARS-CoV-2 reveals inflammatory role of type I  
688 interferon signaling. *bioRxiv*, doi:[10.1101/2020.05.27.118893](https://doi.org/10.1101/2020.05.27.118893) (2020).
- 689 19 Sun, J. *et al.* Generation of a Broadly Useful Model for COVID-19 Pathogenesis,  
690 Vaccination, and Treatment. *Cell*, doi:[10.1016/j.cell.2020.06.010](https://doi.org/10.1016/j.cell.2020.06.010) (2020).
- 691 20 Kaushal, D. *et al.* Mucosal vaccination with attenuated *Mycobacterium tuberculosis*  
692 induces strong central memory responses and protects against tuberculosis. *Nat. Commun* **6**,  
693 8533, doi:[ncomms9533 \[pii\];10.1038/ncomms9533 \[doi\]](https://doi.org/10.1038/ncomms9533) (2015).
- 694 21 Foreman, T. W. *et al.* CD4+ T-cell-independent mechanisms suppress reactivation of  
695 latent tuberculosis in a macaque model of HIV coinfection. *Proc Natl Acad Sci U S A* **113**,  
696 E5636-5644, doi:[10.1073/pnas.1611987113](https://doi.org/10.1073/pnas.1611987113) (2016).
- 697 22 Coperchini, F., Chiovato, L., Croce, L., Magri, F. & Rotondi, M. The cytokine storm in  
698 COVID-19: An overview of the involvement of the chemokine/chemokine-receptor system.  
699 *Cytokine Growth Factor Rev* **53**, 25-32, doi:[10.1016/j.cytogfr.2020.05.003](https://doi.org/10.1016/j.cytogfr.2020.05.003) (2020).
- 700 23 Song, P., Li, W., Xie, J., Hou, Y. & You, C. Cytokine storm induced by SARS-CoV-2. *Clin*  
701 *Chim Acta* **509**, 280-287, doi:[10.1016/j.cca.2020.06.017](https://doi.org/10.1016/j.cca.2020.06.017) (2020).
- 702 24 Costela-Ruiz, V. J., Illescas-Montes, R., Puerta-Puerta, J. M., Ruiz, C. & Melguizo-  
703 Rodriguez, L. SARS-CoV-2 infection: The role of cytokines in COVID-19 disease. *Cytokine*  
704 *Growth Factor Rev*, doi:[10.1016/j.cytogfr.2020.06.001](https://doi.org/10.1016/j.cytogfr.2020.06.001) (2020).

- 705 25 Ye, Q., Wang, B. & Mao, J. The pathogenesis and treatment of the 'Cytokine Storm' in  
706 COVID-19. *J Infect* **80**, 607-613, doi:10.1016/j.jinf.2020.03.037 (2020).
- 707 26 Zhang, X. *et al.* Viral and host factors related to the clinical outcome of COVID-19.  
708 *Nature*, doi:10.1038/s41586-020-2355-0 (2020).
- 709 27 Ong, E. Z. *et al.* A Dynamic Immune Response Shapes COVID-19 Progression. *Cell*  
710 *Host Microbe* **27**, 879-882 e872, doi:10.1016/j.chom.2020.03.021 (2020).
- 711 28 Speirs, I. T., NC. Sex differences in hippocampal cytokines after systemic immune  
712 challenge - <https://www.biorxiv.org/content/10.1101/378257v1>. *BioRxiv* (2020).
- 713 29 Posilico, C. S., IC; Tronson, NC. Sex differences in the hippocampal cytokine response  
714 following systemic lipopolysaccharide. *Brain, Behavior, and Immunity* **66**, e40,  
715 doi:<https://doi.org/10.1016/j.bbi.2017.07.145> (2017).
- 716 30 Toietta, G. *et al.* Reduced inflammation and improved airway expression using helper-  
717 dependent adenoviral vectors with a K18 promoter. *Mol Ther* **7**, 649-658, doi:10.1016/s1525-  
718 0016(03)00059-5 (2003).
- 719 31 Laboratory, T. J. *B6.Cg-Tg(K18-ACE2)2PrImn/J - K18 hACE2 mouse -*  
720 <https://www.jax.org/strain/034860> (2020).
- 721 32 Li; Qi Lv; Jing Xue; Shuran Gong; Mingya Liu; Guanpeng Wang; Shunyi Wang; Linna  
722 Zhao; Peipei Liu; Li Zhao; Fei Ye; Huijuan Wang; Weimin Zhou; Na Zhu; Wei Zhen; Xiaojuan  
723 Zhang; Zhiqi Song; Li Guo; Lan Chen; Conghui Wang; Ying Wang; Xinming Wang; Yan Xiao;  
724 Qiangming Sun; Hongqi Liu; Fanli Zhu; Chunxia Ma; Lingmei Yan; Mengli Yan; Jun Han; Wenbo  
725 Xu; Wenjie Tan; Xiaozhong Peng; Qi Jin; Guizhen Wu; Chuan Qin, L. B. W. D. B. H. H. G. L. R.  
726 Q. W. P. Y. Y. X. J. L. F. Q. Y. Q. W. W. F. The Pathogenicity of 2019 Novel Coronavirus in  
727 hACE2 Transgenic Mice. *BioRxiv* <https://doi.org/10.1101/2020.02.07.939389> (2020).
- 728 33 Lofgren, E., Fefferman, N. H., Naumov, Y. N., Gorski, J. & Naumova, E. N. Influenza  
729 seasonality: underlying causes and modeling theories. *J Virol* **81**, 5429-5436,  
730 doi:10.1128/JVI.01680-06 (2007).

- 731 34 Tisoncik, J. R. *et al.* Into the eye of the cytokine storm. *Microbiol Mol Biol Rev* **76**, 16-32,  
732 doi:10.1128/MMBR.05015-11 (2012).
- 733 35 Yuen, K. Y. & Wong, S. S. Human infection by avian influenza A H5N1. *Hong Kong Med*  
734 *J* **11**, 189-199 (2005).
- 735 36 Huang, K. J. *et al.* An interferon-gamma-related cytokine storm in SARS patients. *J Med*  
736 *Viro* **75**, 185-194, doi:10.1002/jmv.20255 (2005).
- 737 37 Cameron, M. J. *et al.* Interferon-mediated immunopathological events are associated  
738 with atypical innate and adaptive immune responses in patients with severe acute respiratory  
739 syndrome. *J Virol* **81**, 8692-8706, doi:10.1128/JVI.00527-07 (2007).
- 740 38 Moyron-Quiroz, J. E. *et al.* Role of inducible bronchus associated lymphoid tissue  
741 (iBALT) in respiratory immunity. *Nat Med* **10**, 927-934, doi:10.1038/nm1091 (2004).
- 742 39 Park, W. Y. *et al.* Cytokine balance in the lungs of patients with acute respiratory distress  
743 syndrome. *Am J Respir Crit Care Med* **164**, 1896-1903, doi:10.1164/ajrccm.164.10.2104013  
744 (2001).
- 745 40 Sun, L. *et al.* New concepts of IL-10-induced lung fibrosis: fibrocyte recruitment and M2  
746 activation in a CCL2/CCR2 axis. *Am J Physiol Lung Cell Mol Physiol* **300**, L341-353,  
747 doi:10.1152/ajplung.00122.2010 (2011).
- 748 41 Tanaka, T. & Kishimoto, T. The biology and medical implications of interleukin-6. *Cancer*  
749 *Immunol Res* **2**, 288-294, doi:10.1158/2326-6066.CIR-14-0022 (2014).
- 750 42 Antczak, A. *et al.* Analysis of changes in expression of IL-4/IL-13/STAT6 pathway and  
751 correlation with the selected clinical parameters in patients with atopic asthma. *Int J*  
752 *Immunopathol Pharmacol* **29**, 195-204, doi:10.1177/0394632015623794 (2016).
- 753 43 Junttila, I. S. Tuning the Cytokine Responses: An Update on Interleukin (IL)-4 and IL-13  
754 Receptor Complexes. *Front Immunol* **9**, 888, doi:10.3389/fimmu.2018.00888 (2018).
- 755 44 Chen, Z. *et al.* IL-6, IL-10 and IL-13 are associated with pathogenesis in children with  
756 Enterovirus 71 infection. *Int J Clin Exp Med* **7**, 2718-2723 (2014).



- 757 45 Kasashima, S. *et al.* Upregulated interleukins (IL-6, IL-10, and IL-13) in immunoglobulin  
758 G4-related aortic aneurysm patients. *J Vasc Surg* **67**, 1248-1262, doi:10.1016/j.jvs.2016.12.140  
759 (2018).
- 760 46 Kenney, A. D. *et al.* IFITM3 protects the heart during influenza virus infection. *Proc Natl*  
761 *Acad Sci U S A* **116**, 18607-18612, doi:10.1073/pnas.1900784116 (2019).
- 762 47 Biernacki, K., Prat, A., Blain, M. & Antel, J. P. Regulation of Th1 and Th2 lymphocyte  
763 migration by human adult brain endothelial cells. *J Neuropathol Exp Neurol* **60**, 1127-1136,  
764 doi:10.1093/jnen/60.12.1127 (2001).
- 765 48 Gadani, S. P., Cronk, J. C., Norris, G. T. & Kipnis, J. IL-4 in the brain: a cytokine to  
766 remember. *J Immunol* **189**, 4213-4219, doi:10.4049/jimmunol.1202246 (2012).
- 767 49 de Aquino, M. T. *et al.* IL-27 limits central nervous system viral clearance by promoting  
768 IL-10 and enhances demyelination. *J Immunol* **193**, 285-294, doi:10.4049/jimmunol.1400058  
769 (2014).
- 770 50 Yoshida, H. & Hunter, C. A. The immunobiology of interleukin-27. *Annu Rev Immunol*  
771 **33**, 417-443, doi:10.1146/annurev-immunol-032414-112134 (2015).
- 772 51 Strle, K. *et al.* Interleukin-10 in the brain. *Crit Rev Immunol* **21**, 427-449 (2001).
- 773 52 Kawanokuchi, j. T., H; Sonobe, Y; Mizuno, T; Suzumura, A. Interleukin-27 promotes  
774 inflammatory and neuroprotective responses in microglia. *Clinical & Experimental*  
775 *Neuroimmunology* **4**, 36-45 (2013).
- 776 53 Deczkowska, A., Baruch, K. & Schwartz, M. Type I/II Interferon Balance in the  
777 Regulation of Brain Physiology and Pathology. *Trends Immunol* **37**, 181-192,  
778 doi:10.1016/j.it.2016.01.006 (2016).
- 779 54 Kuba, K. *et al.* A crucial role of angiotensin converting enzyme 2 (ACE2) in SARS  
780 coronavirus-induced lung injury. *Nat Med* **11**, 875-879, doi:10.1038/nm1267 (2005).
- 781 55 Wood, H. New insights into the neurological effects of COVID-19. *Nat Rev Neurol*,  
782 doi:10.1038/s41582-020-0386-7 (2020).



- 783 56 Lan, J. *et al.* Structure of the SARS-CoV-2 spike receptor-binding domain bound to the  
784 ACE2 receptor. *Nature*, doi:10.1038/s41586-020-2180-5 (2020).
- 785 57 Wan, Y., Shang, J., Graham, R., Baric, R. S. & Li, F. Receptor Recognition by the Novel  
786 Coronavirus from Wuhan: an Analysis Based on Decade-Long Structural Studies of SARS  
787 Coronavirus. *J Virol* **94**, doi:10.1128/JVI.00127-20 (2020).
- 788 58 Wang, Q. *et al.* Structural and Functional Basis of SARS-CoV-2 Entry by Using Human  
789 ACE2. *Cell*, doi:10.1016/j.cell.2020.03.045 (2020).
- 790 59 Shang, J. *et al.* Structural basis of receptor recognition by SARS-CoV-2. *Nature* **581**,  
791 221-224, doi:10.1038/s41586-020-2179-y (2020).
- 792 60 Yu, J. *et al.* DNA vaccine protection against SARS-CoV-2 in rhesus macaques. *Science*,  
793 doi:10.1126/science.abc6284 (2020).
- 794 61 Chandrashekar, A. *et al.* SARS-CoV-2 infection protects against rechallenge in rhesus  
795 macaques. *Science*, doi:10.1126/science.abc4776 (2020).
- 796 62 Singh, D. G., SR; Singh, B; Cole, J; 1,2,Alfson KJ; Clemmons, E; ,Gazi, M; Gonzalez, O;  
797 Escobedo, R; Lee, T-H; Chatterjee, A; Goetz-Gazi, Y; Sharan, R; Thippeshappa, R; Gough, M;  
798 Alvarez, C; Blakley, A; Ferdin, J; Bartley, C; Staples, H; Parodi, P; Callery, J; Mannino, A;  
799 Klaffke, B; Escareno, P; Plattll, RN; Hodara, V; Scordo, JM; Oyejide, A; Ajithdoss DK; Copin, R;  
800 Baum, A; Kyratsous, C; Alvarez, X; Rosas, B; Ahmed, M; Goodroe, A; Dutton, J; Hall-Ursone,  
801 S; Frost, PA; Voges, AK; Ross, CN; Sayers, K; Chen, C; Hallam, C; Khader, SA; Mitreva, M;  
802 Anderson. TJC; Martinez-Sobrido, L; Patterson, JL; Turner, J; Torrelles, JB; Dick Jr, EJ; Brasky,  
803 K; Schlesinger, LS; Giavedoni, LD; Carrion Jr, R; Kaushal, D. SARS-CoV-2 infection leads to  
804 acute infection with dynamic cellular and inflammatory flux in the lung that varies across  
805 nonhuman primate species - <https://www.biorxiv.org/content/10.1101/2020.06.05.136481v1>.  
806 *BioRxiv* (2020).
- 807 63 Woolsey, C. *et al.* Establishment of an African green monkey model for COVID-19.  
808 *bioRxiv*, doi:10.1101/2020.05.17.100289 (2020).

809 64 Boudewijns, R. T., HJ; Kaptein, SFJ; Li, R; Vergote, V; Seldeslachts, L; De Keyzer, C;  
810 Sharma, S; Jansen, S; Van Weyenbergh, J; Ma, J; Marten,s E; et al. . STAT2 signaling as  
811 double-edged sword restricting viral dissemination but driving severe pneumonia in SARS-CoV-  
812 2 infected hamsters. <https://doi.org/10.1101/2020.04.23.056838>. *bioRxiv*,  
813 doi:<https://doi.org/10.1101/2020.04.23.056838> (2020).

814 65 Chan, J. F. *et al.* Simulation of the clinical and pathological manifestations of  
815 Coronavirus Disease 2019 (COVID-19) in golden Syrian hamster model: implications for  
816 disease pathogenesis and transmissibility. *Clin Infect Dis*, doi:10.1093/cid/ciaa325 (2020).

817 66 Sia, S. Y., L-M; Chin AWH; Fung, K; Poon, LLM; Nicholls, JM; Peiris, M; Yen H-L.  
818 *Pathogenesis and transmission of SARS-CoV-2 virus in golden Syrian hamsters - DOI:*  
819 *10.21203/rs.3.rs-20774/v1*, 2020).

820 67 Arimori, Y. *et al.* Type I interferon limits influenza virus-induced acute lung injury by  
821 regulation of excessive inflammation in mice. *Antiviral Res* **99**, 230-237,  
822 doi:10.1016/j.antiviral.2013.05.007 (2013).

823 68 Shepardson, K. M. *et al.* IFNAR2 Is Required for Anti-influenza Immunity and Alters  
824 Susceptibility to Post-influenza Bacterial Superinfections. *Front Immunol* **9**, 2589,  
825 doi:10.3389/fimmu.2018.02589 (2018).

826

827

828

829

830

831

832

833

834 **FIGURE LEGENDS**

835 **Figure 1. Infection of K18 hACE2 transgenic and WT C57BL/6 mice with SARS-CoV-2.** K18  
836 hACE2 transgenic and WT C57BL/6 female and male mice were mock-infected (N=3/group) or  
837 infected i.n. (N=4/group) with  $1 \times 10^5$  PFU of SARS-CoV-2. Body weight (**A**) and survival (**B**) were  
838 evaluated at the indicated DPI. Mice that loss more than 25% of their initial body weight were  
839 humanely euthanized. Error bars represent standard deviations (SD) of the mean for each group  
840 of mice. (**C-E**) K18 transgenic hACE2 and WT C57BL/6 male (N=3) and female (N=3) mice were  
841 similarly infected and sacrificed at 2 and 4 DPI and viral titers in different organs (nasal turbinate,  
842 trachea, lung, brain, heart, kidney, liver, spleen, small intestine, and large intestine) were  
843 determined by plaque assay (PFU/ml). Data from virus containing organs and/or tissue samples  
844 are shown: nasal turbinates (**C**), lungs (**D**) and brain (**E**). Symbols represent data from individual  
845 mouse, and bars the geometric means of viral titers. ND, not detected. Dotted lines indicate the  
846 limit of detection, LOD ( $10^2$  PFU/ml). DPI: Days post-infection.

847  
848 **Figure 2. SARS-CoV-2 infected K18 hACE2 transgenic mice show a marked chemokine**  
849 **storm in selected tissues.** (**A**) Lung, (**B**) spleen and (**C**) brain. Student's t-test C57BL/6 vs. K18  
850 hACE2 \* $p < 0.05$ ; \*\* $p < 0.005$ ; \*\*\* $p < 0.0005$ ; 2-WAY ANOVA C57BL/6 or K18 hACE2 transgenic  
851 mice over time, § $p < 0.05$ ; §§ $p < 0.005$ ; §§§ $p < 0.0005$ , N= 8 (per time-point studied, except mock  
852 N=3). DPI: Days post-infection.

853  
854 **Figure 3. SARS-CoV-2 infected K18 hACE2 transgenic mice show a marked cytokine storm**  
855 **in selected tissues.** (**A**) Lungs, (**B**) spleen and (**C**) brain. Student's t-test C57BL/6 vs. K18 hACE2  
856 \* $p < 0.05$ ; \*\* $p < 0.005$ ; \*\*\* $p < 0.0005$ ; 2-WAY ANOVA C57BL/6 or K18 hACE2 transgenic mice over  
857 time, § $p < 0.05$ ; §§ $p < 0.005$ ; §§§ $p < 0.0005$ , N= 8 (per time-point studied, except mock N=2). DPI:  
858 Days post-infection.

859 **Figure 4. SARS-CoV-2 infected K18 hACE2 transgenic mice reveal differentiated clusters**  
860 **of chemokine and cytokine correlations with clinical symptoms progression.** Hierarchically  
861 clustered Pearson correlations of measurements in (A) lung, (B) spleen and (C) brain of SARS-  
862 CoV-2 infected K18 hACE2 transgenic mice. Positive correlation (Red = 1) and negative  
863 correlations (Blue = -1), with clusters (Black outlined boxes with cluster number). Non-significant  
864 values ( $p > 0.05$  measured by Pearson's correlation t-test) were left blank. DPI: Days post-  
865 infection. MIP-2/CXCL2; MCP-1/CCL2; MIP-1 $\alpha$ /CCL3; MIP-1 $\beta$ /CCL4; RANTES/CCL5; IP-  
866 10/CXCL10.

867  
868 **Figure 5. K18 hACE2 transgenic mice develop rhinitis, pneumonia with associated**  
869 **pulmonary inflammation after infection with SARS-CoV-2. (A-D and I-L) WT C57BL/6 mice.**  
870 Minimal mononuclear and neutrophilic interstitial pneumonia in WT lung at 2-DPI (A, B bracket).  
871 By 4-DPI (5C, D) minimal alveolar histiocytosis (D, asterisk) pneumocyte type II cells (D,  
872 arrowheads), perivascular mononuclear inflammation (D, bracket) and rhinitis with low numbers  
873 of neutrophils (K, arrowhead) were variably observed. Lymphocyte aggregates in the lamina  
874 propria of the small intestine (I, asterisk). Mixed mononuclear inflammation with individual  
875 hepatocellular necrosis (J, arrowhead). Brain from WT 4-DPI was normal (L). (E-H and M-P) K18  
876 hACE2 transgenic mice. Interstitial pneumonia (E, F) associated with alveolar histiocytosis  
877 admixed neutrophils and lymphocytes (F, asterisks), mild type II pneumocyte hyperplasia (F,  
878 arrowhead), bronchiolar syncytia (F, arrow), endothelial cells hyperplasia and vasculitis (F,  
879 bracket) by 2-DPI. Gut associated lymphoid tissue (GALT) with prominent germinal centers was  
880 observed (M, asterisk). Liver inflammation with variable amounts of individual hepatocellular  
881 necrosis (N, arrowhead). Greater lung involvement indicative of pneumonia (G), with  
882 inflammatory cellular accumulations and hemorrhage in alveolar spaces (H, asterisk) and  
883 interstitium (H, bracket), intra-alveolar fibrin admixed cellular debris (H, arrow), vasculitis (H,  
884 bracket), edema (H, arrowhead) by 4-DPI. Neutrophilic rhinitis observed at 4-DPI (O, bracket).

885 Mild meningoencephalitis with vasculitis (**P, arrowhead**). Scale bars left images, 1 mm. Scale  
886 bars right images, 50  $\mu$ m. DPI: Days post-infection.

887

888 **Figure 6. IHC examination of tissue from K18 hACE2 transgenic and WT C57BL/6 mice**  
889 **infected with SARS-CoV-2. (A)** WT and K18 hACE2 transgenic C57BL/6 mice nasal turbinate  
890 (top, at 2-DPI), lung tissue (middle, at 2-DI) and brain (bottom, at 4-DPI) stained with an antibody  
891 against SARS-CoV-2 NP (red) or with antibody recognizing hACE2 receptor (red). **(B)** Infected  
892 choroid plexus in the brains of SARS-CoV-2-infected K18 hACE2 transgenic mice at 4-DPI. Left  
893 panel show that the hACE2 receptor (red) is highly expressed in the choroid plexus (all nuclei  
894 shown in aqua-blue). Right panel shows that some cells in the choroid plexus are infected with  
895 SARS-CoV-2 as these are positive to a SARS-CoV-2 NP (in red).

896

897

898

899

900

901

902

903

904

905

906

907

908

909

910

911 **SUPPLEMENTAL MATERIAL**

912 **Supplemental Figure legends**

913 **Figure S1. Infection of K18 hACE2 transgenic and WT C57BL/6 mice with SARS-CoV-2.**

914 Female and male K18 hACE2 transgenic and WT C57BL/6 mice were mock-infected (N=3/group)  
915 or infected (N=4/group) i.n. with  $1 \times 10^5$  PFU of SARS-CoV-2. Body weight (**A, B**) and survival (**C,**  
916 **D**) were evaluated at the indicated DPI. Mice that loss more than 25% of their initial body weight  
917 were humanely euthanized. Error bars represent standard deviations (SD) of the mean for each  
918 group of mice. DPI: Days post-infection.

919  
920 **Figure S2. Viral loads in male and female K18 hACE2 transgenic and WT C57BL/6 mice**

921 **infected with SARS-CoV-2.** K18 hACE2 transgenic and WT C57BL/6 male (N=4/group) and  
922 female (N=4/group) mice were infected as in Figure S1 and sacrificed at 2- and 4-DPI and viral  
923 titers in different organs (nasal turbinate, trachea, lung, brain, heart, kidney, liver, spleen, small  
924 intestine, and large intestine) were determined by plaque assay (PFU/ml). Only data from virus  
925 containing organs and/or tissue samples are shown: nasal turbinate (**A**), lungs (**B**) and brain (**C**).  
926 Symbols represent data from individual mouse, and bars the geometric means of viral titers. @,  
927 virus not detected in one mouse; &, virus not detected in two mice; #, virus not detected in three  
928 mice; ND, not detected. Dotted black lines indicate the limit of detection ( $10^2$  PFU/ml). DPI: Days  
929 post-infection.

930  
931 **Figure S3. Chemokine profile in selected tissues from SARS-CoV-2 infected K18 hACE2**

932 **transgenic mice. (A)** Nasal turbinates and **(B)** Trachea. Student's *t*-test C57BL/6 vs. K18 hACE2  
933 \* $p < 0.05$ ; \*\* $p < 0.005$ ; \*\*\* $p < 0.0005$ ; 2-WAY ANOVA C57BL/6 or K18 hACE2 transgenic mice over  
934 time, § $p < 0.05$ ; §§ $p < 0.005$ ; §§§ $p < 0.0005$ , N= 8 (per time-point studied, except mock N=2). DPI:  
935 Days post-infection.

936 **Figure S4. Cytokine profile in selected tissues from SARS-CoV-2 infected K18 hACE2**  
937 **transgenic mice. (A) Nasal turbinates and (B) Trachea.** Student's t-test C57BL/6 vs. K18  
938 transgenic hACE2 \* $p < 0.05$ ; \*\* $p < 0.005$ ; \*\*\* $p < 0.0005$ ; 2-WAY ANOVA C57BL/6 or K18 hACE2  
939 transgenic mice over time, § $p < 0.05$ ; §§ $p < 0.005$ ; §§§ $p < 0.0005$ , N= 8 (per time-point studied, except  
940 mock N=2). DPI: Days post-infection.

941  
942 **Figure S5. Chemokine and cytokine profile in selected tissues from SARS-CoV-2 infected**  
943 **K18 hACE2 transgenic mice by sex.** Chemokines and cytokine differences in the (A) lung and  
944 (B) brain in K18 hACE2 transgenic and WT C57BL/6 male and female mice. Student's t-test  
945 C57BL/6 vs. K18 hACE2 \* $p < 0.05$ ; \*\* $p < 0.005$ ; \*\*\* $p < 0.0005$ ; 2-WAY ANOVA C57BL/6 or K18  
946 hACE2 transgenic mice over time, § $p < 0.05$ ; §§ $p < 0.005$ ; §§§ $p < 0.0005$ , N= 4/group/sex (per time-  
947 point studied, except mock N=2). DPI: Days post-infection.

948  
949 **Figure S6. SARS-CoV-2 infected K18 hACE2 transgenic mice reveal differentiated clusters**  
950 **of chemokine and cytokine correlations with clinical symptoms progression.** Hierarchically  
951 clustered Pearson correlations of measurements in (A) nasal turbinate and (B) trachea of SARS-  
952 CoV-2 infected K18 hACE2 transgenic mice (Left: 2-DPI, Right: 4-DPI). Positive correlation (Red  
953 = 1) and negative correlations (Blue = -1), with clusters (Black outlined boxes with cluster number).  
954 Non-significant values ( $p > 0.05$  measured by Pearson's correlation t-test) left blank. DPI: Days  
955 post-infection. MIP-2/CXCL2; MCP-1/CCL2; MIP-1 $\alpha$ /CCL3; MIP-1 $\beta$ /CCL4; RANTES/CCL5; IP-  
956 10/CXCL10.

957  
958 **Figure S7. Immune response of SARS-CoV-2 infected K18 hACE2 transgenic mice is**  
959 **dependent on mouse sex.** Hierarchically clustered Pearson correlations of measurements in  
960 lung at (A) 2- and (B) 4-DPI and brain at (C) 2- and (D) 4-DPI of SARS-CoV-2 infected K18 hACE2

961 transgenic mice (Left: Males, Right: Females). Positive correlation (Red = 1) and negative  
962 correlations (Blue = -1), with clusters (Black outlined boxes with cluster number). Non-significant  
963 values ( $p > 0.05$  measured by Pearson's correlation t-test) left blank. DPI: Days post-infection.  
964 MIP-2/CXCL2; MCP-1/CCL2; MIP-1 $\alpha$ /CCL3; MIP-1 $\beta$ /CCL4; RANTES/CCL5; IP-10/CXCL10.  
965  
966  
967



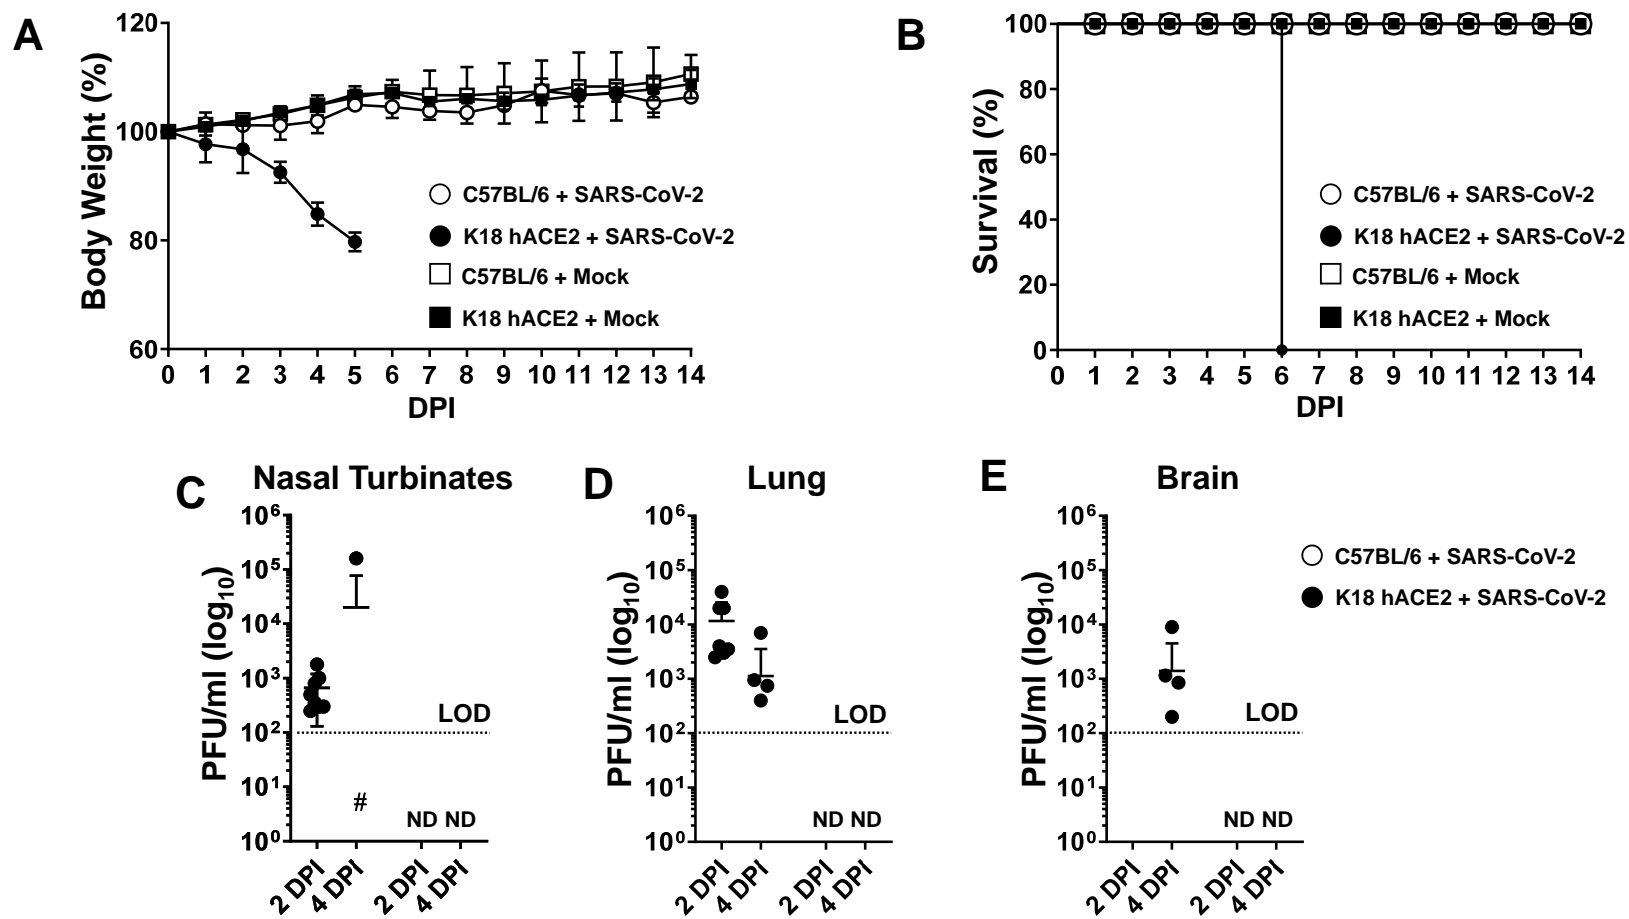

**Figure 1. Infection of K18 hACE2 transgenic and WT C57BL/6 mice with SARS-CoV-2.** K18 hACE2 transgenic and WT C57BL/6 female and male mice were mock-infected (N=3/group) or infected i.n. (N=4/group) with  $1 \times 10^5$  PFU of SARS-CoV-2. Body weight (A) and survival (B) were evaluated at the indicated DPI. Mice that loss more than 25% of their initial body weight were humanely euthanized. Error bars represent standard deviations (SD) of the mean for each group of mice. (C-E) K18 transgenic hACE2 and WT C57BL/6 male (N=3) and female (N=3) mice were similarly infected and sacrificed at 2 and 4 DPI and viral titers in different organs (nasal turbinate, trachea, lung, brain, heart, kidney, liver, spleen, small intestine, and large intestine) were determined by plaque assay (PFU/ml). Data from virus containing organs and/or tissue samples are shown: nasal turbinates (C), lungs (D) and brain (E). Symbols represent data from individual mouse, and bars the geometric means of viral titers. ND, not detected. Dotted lines indicate the limit of detection, LOD ( $10^2$  PFU/ml). DPI: Days post-infection.

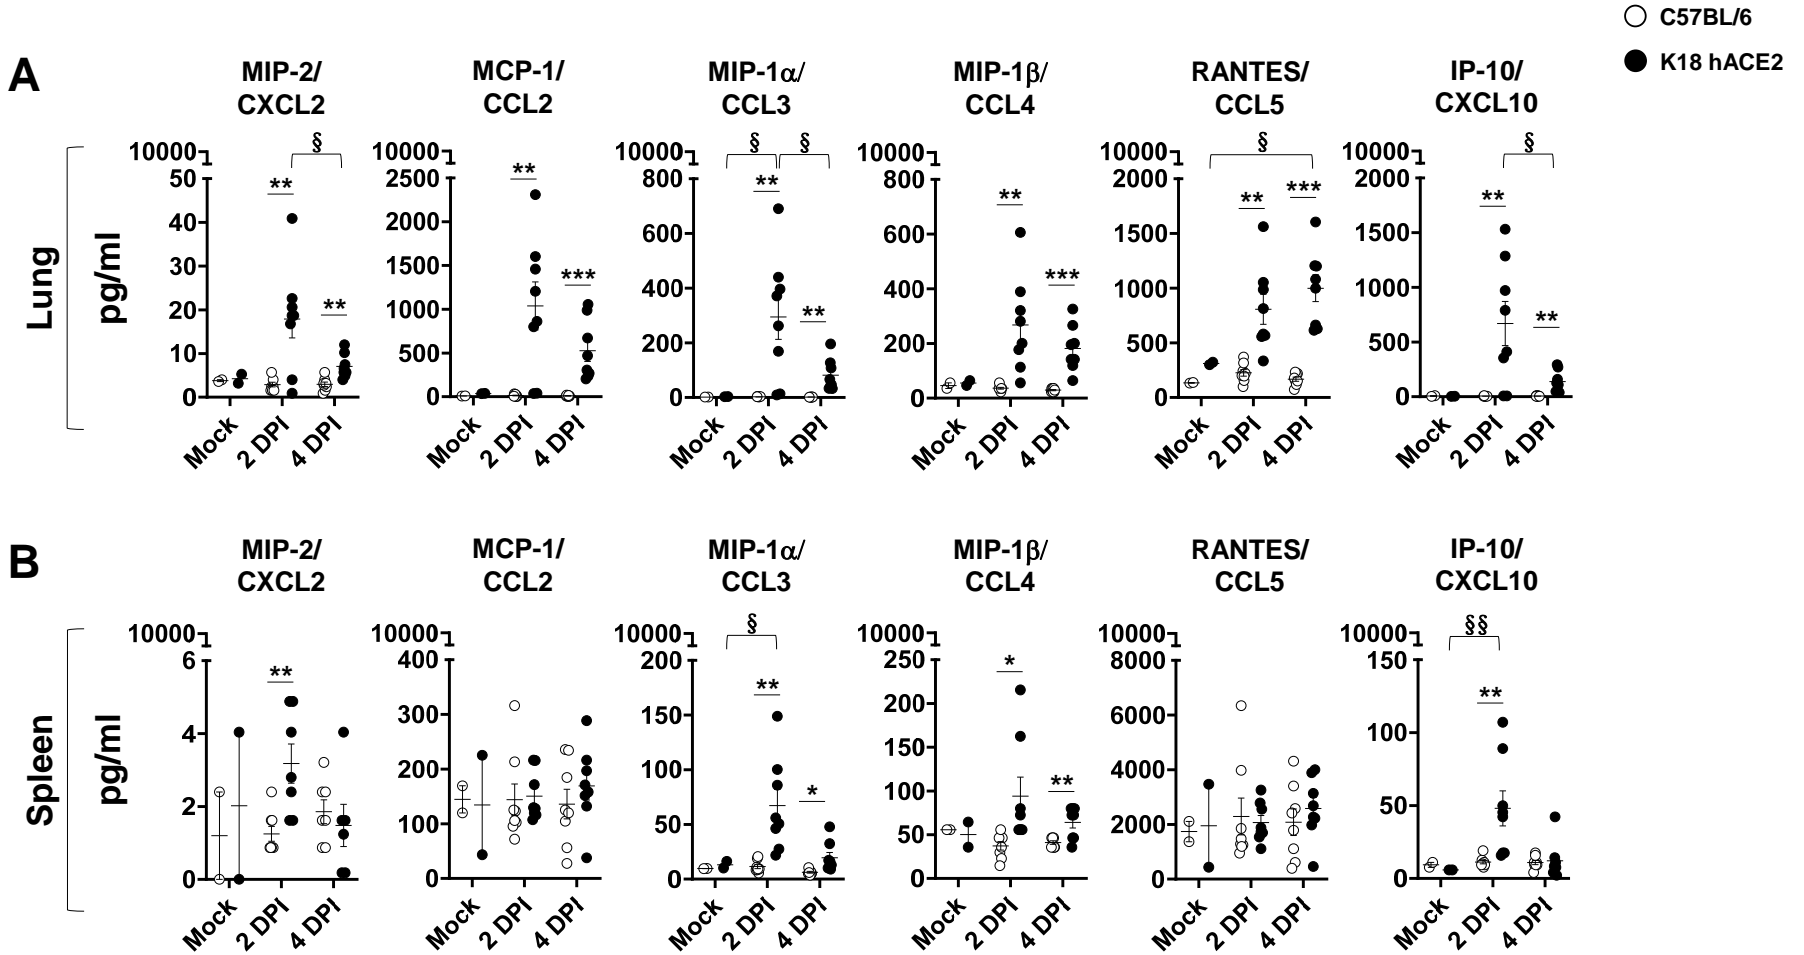

**Figure 2. SARS-CoV-2 infected K18 hACE2 transgenic mice show a marked chemokine storm in selected tissues. (A) Lung, (B) spleen and (C) brain. Student's t-test C57BL/6 vs. K18 hACE2 \* $p < 0.05$ ; \*\* $p < 0.005$ ; \*\*\* $p < 0.0005$ ; 2-WAY ANOVA C57BL/6 or K18 hACE2 transgenic mice over time, § $p < 0.05$ ; §§ $p < 0.005$ ; §§§ $p < 0.0005$ , N= 8 (per time-point studied, except mock N=3). DPI: Days post-infection.**

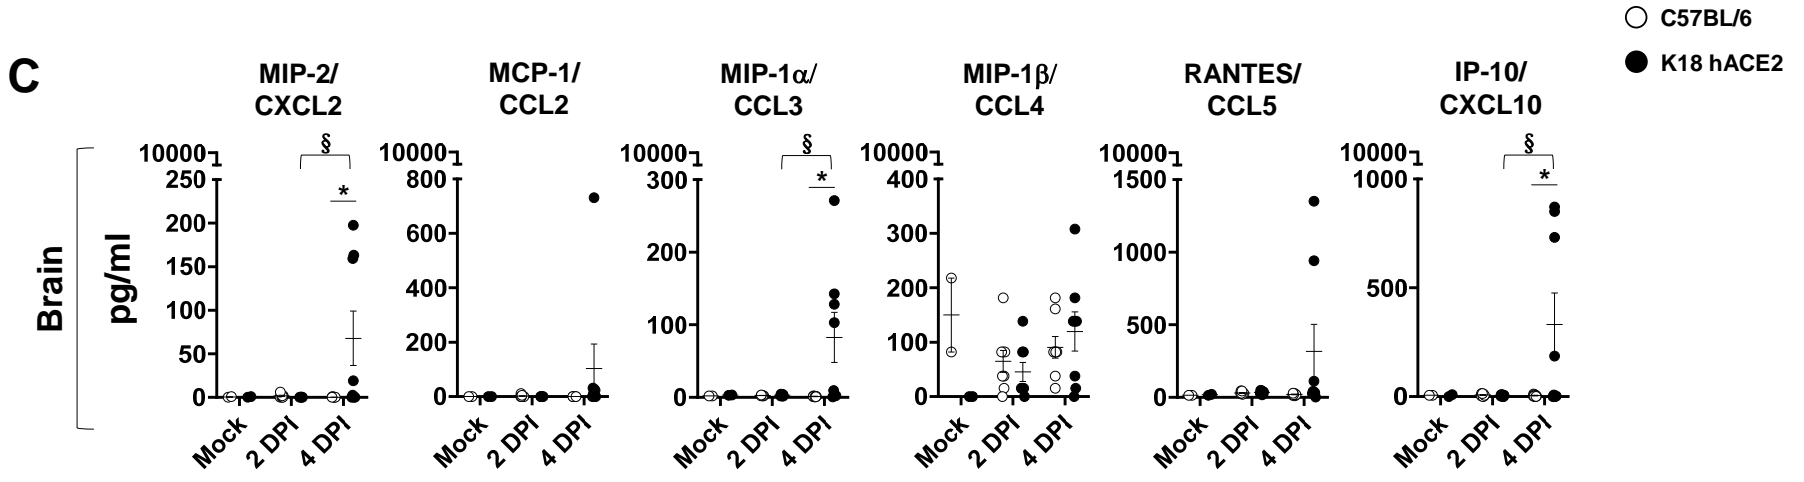

Figure 2. (Continuation).

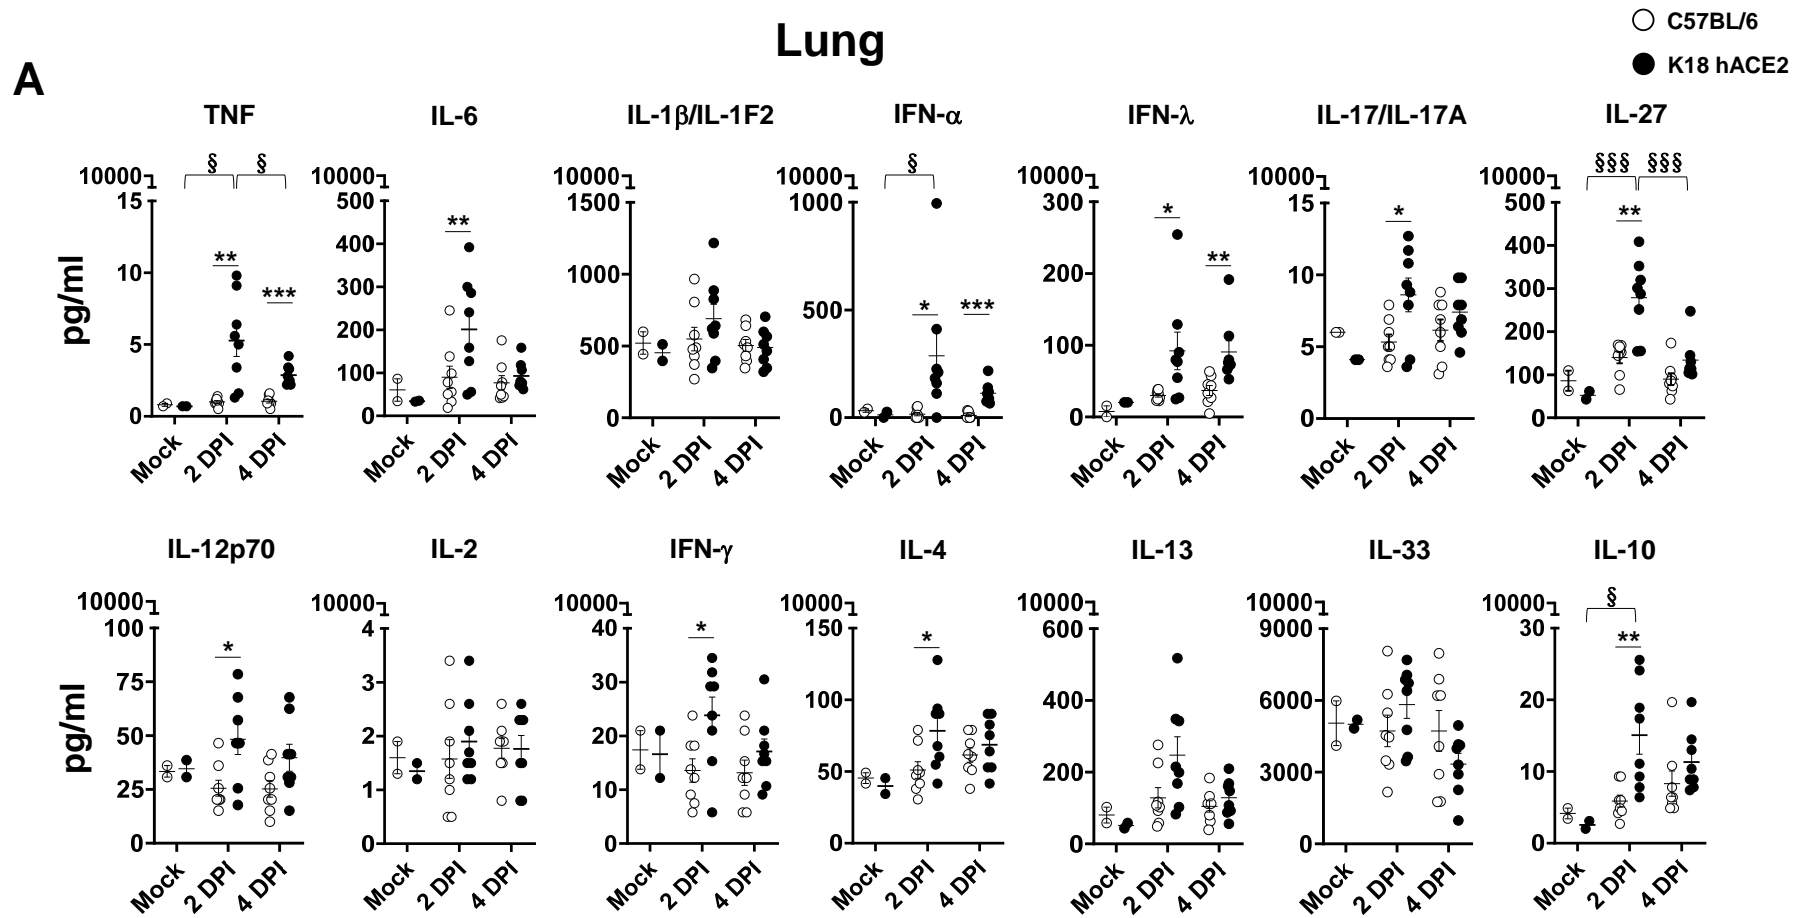

**Figure 3. SARS-CoV-2 infected K18 hACE2 transgenic mice show a marked cytokine storm in selected tissues. (A) Lungs, (B) spleen and (C) brain.** Student's t-test C57BL/6 vs. K18 hACE2 \* $p < 0.05$ ; \*\* $p < 0.005$ ; \*\*\* $p < 0.0005$ ; 2-WAY ANOVA C57BL/6 or K18 hACE2 transgenic mice over time, § $p < 0.05$ ; §§ $p < 0.005$ ; §§§ $p < 0.0005$ , N= 8 (per time-point studied, except mock, N=2). DPI: Days post-infection.

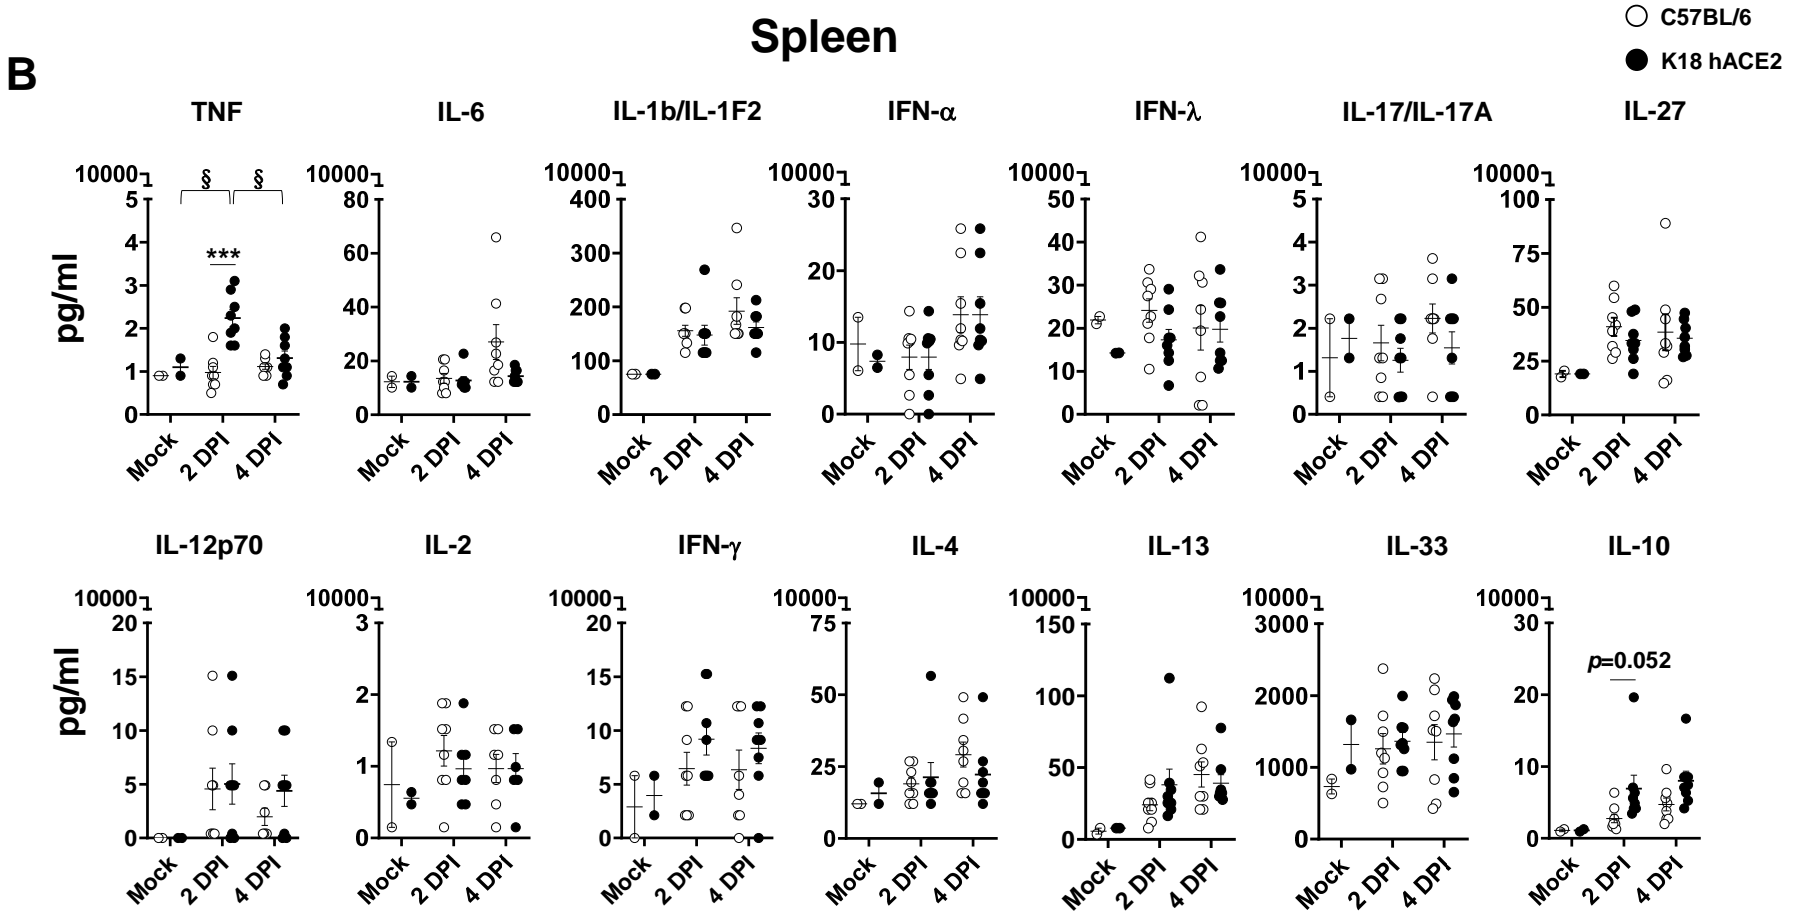

Figure 3. (Continuation).

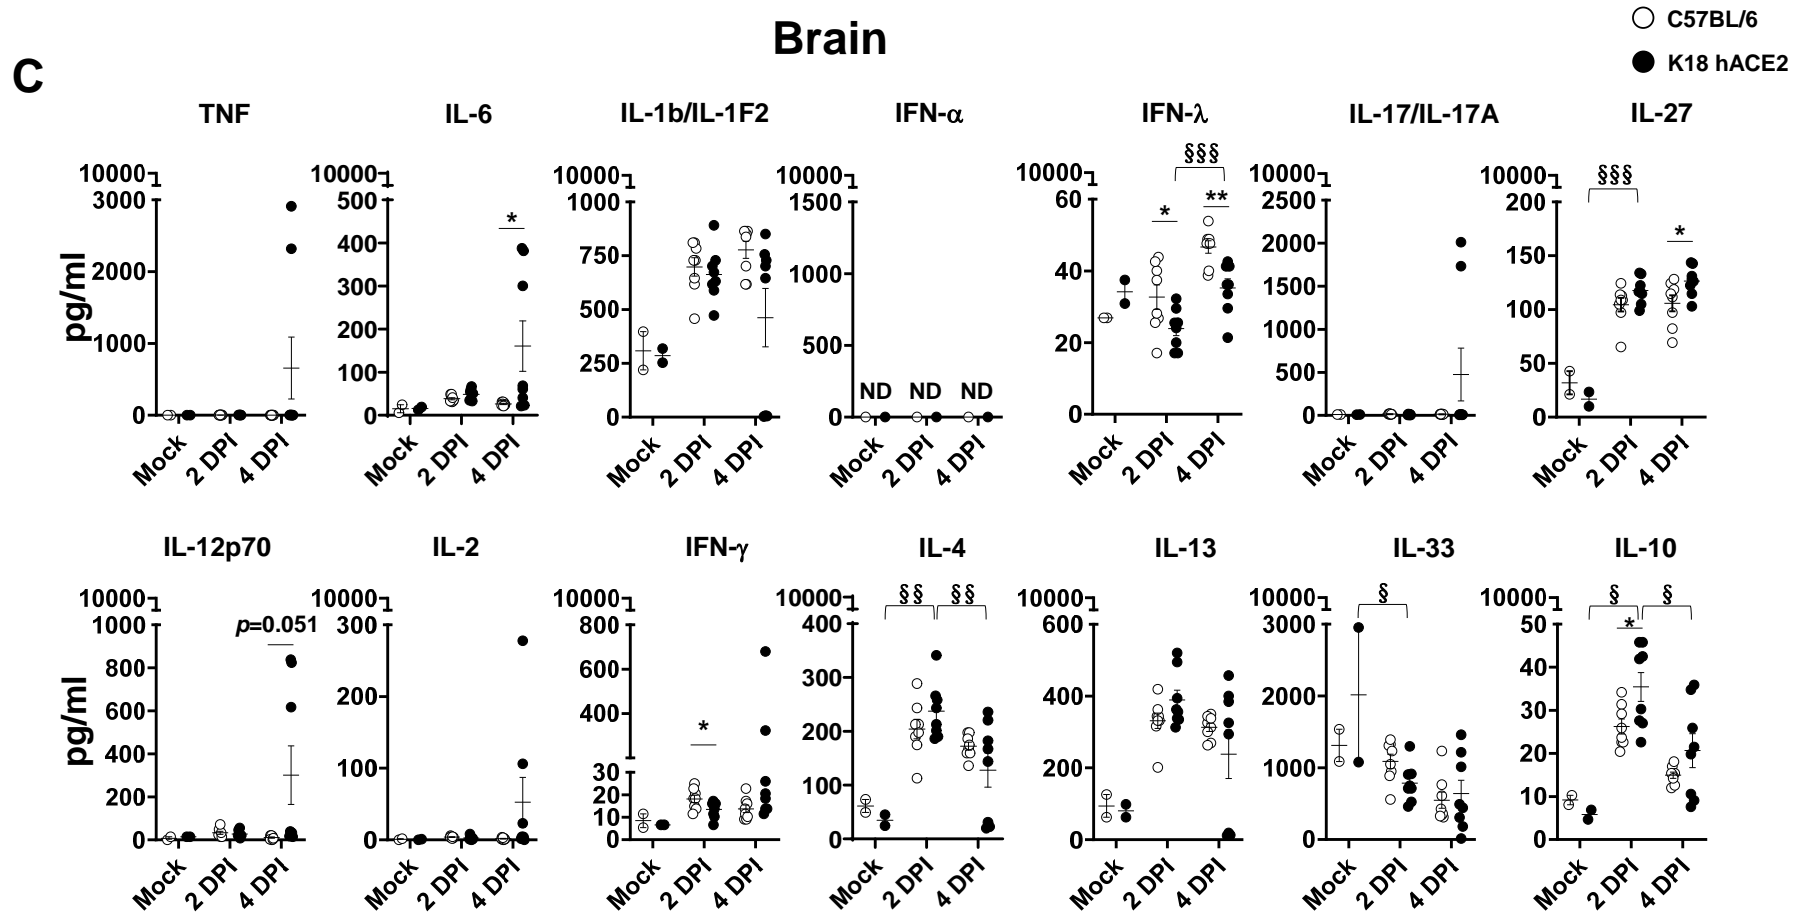

Figure 3. (Continuation).

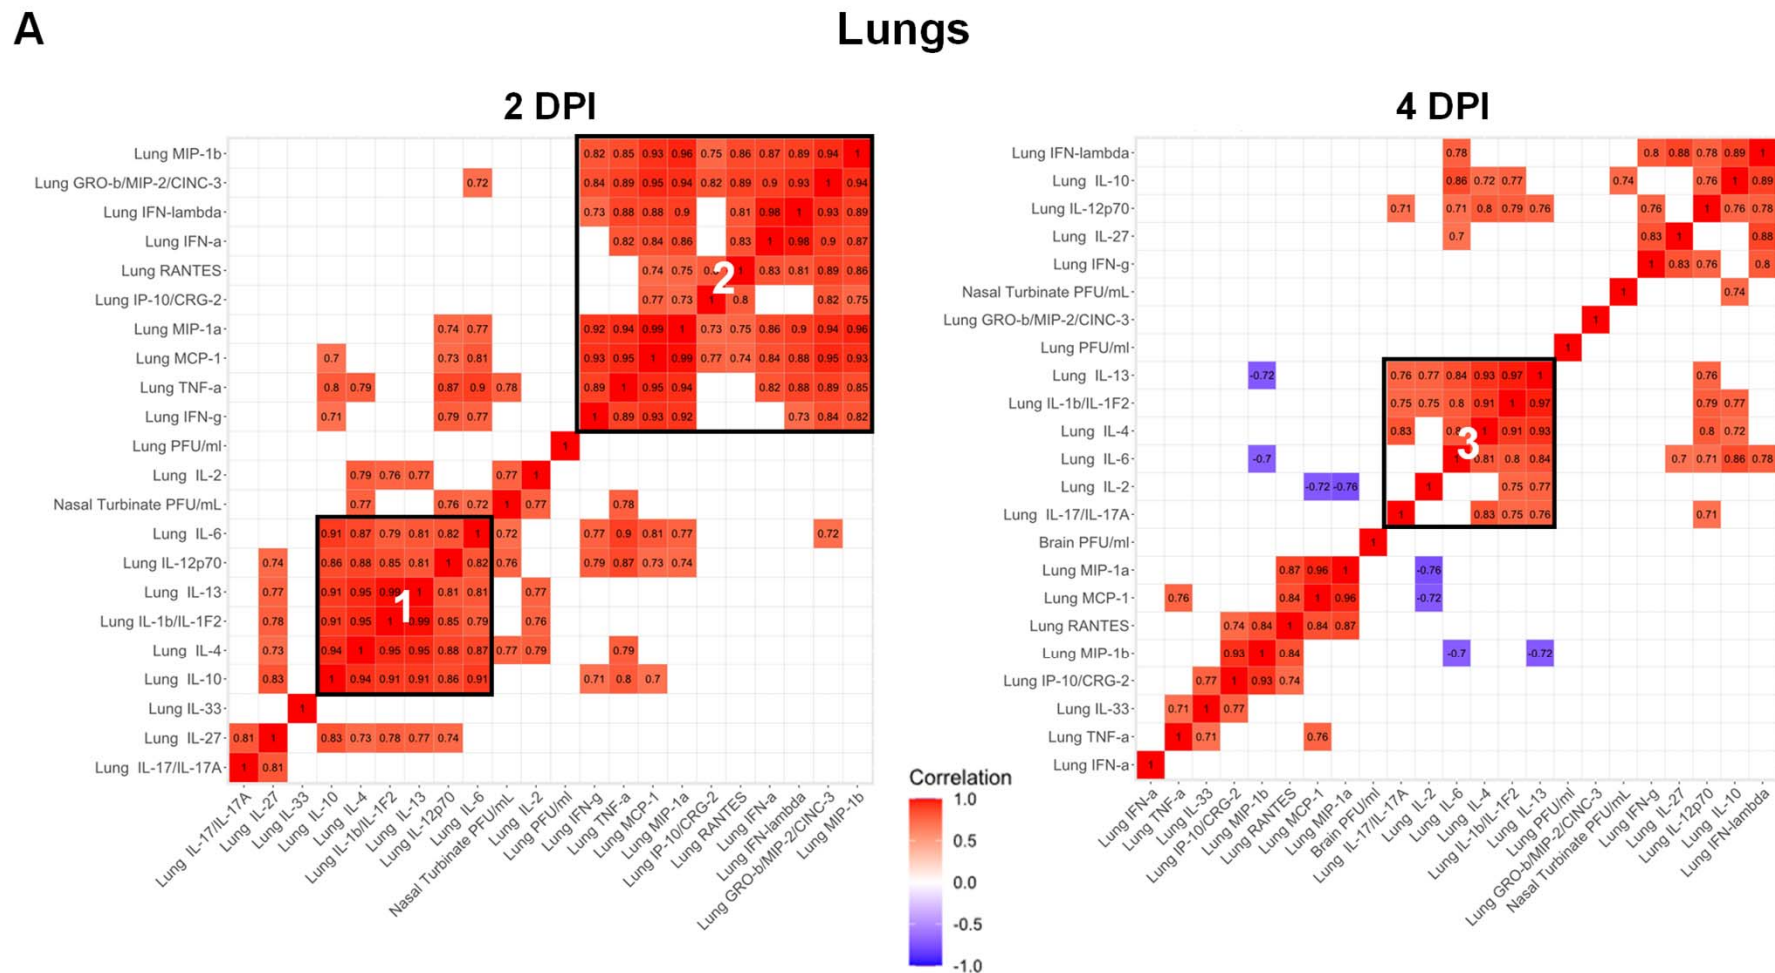

**Figure 4. SARS-CoV-2 infected K18 hACE2 transgenic mice reveal differentiated clusters of chemokine and cytokine correlations with clinical symptoms progression.** Hierarchically clustered Pearson correlations of measurements in (A) lung, (B) spleen and (C) brain of SARS-CoV-2 infected K18 hACE2 transgenic mice. Positive correlation (Red = 1) and negative correlations (Blue = -1), with clusters (Black outlined boxes with cluster number). Non-significant values ( $p > 0.05$  measured by Pearson's correlation t-test) were left blank. DPI: Days post-infection. MIP-2/CXCL2; MCP-1/CCL2; MIP-1a/CCL3; MIP-1b/CCL4; RANTES/CCL5; IP-10/CXCL10.

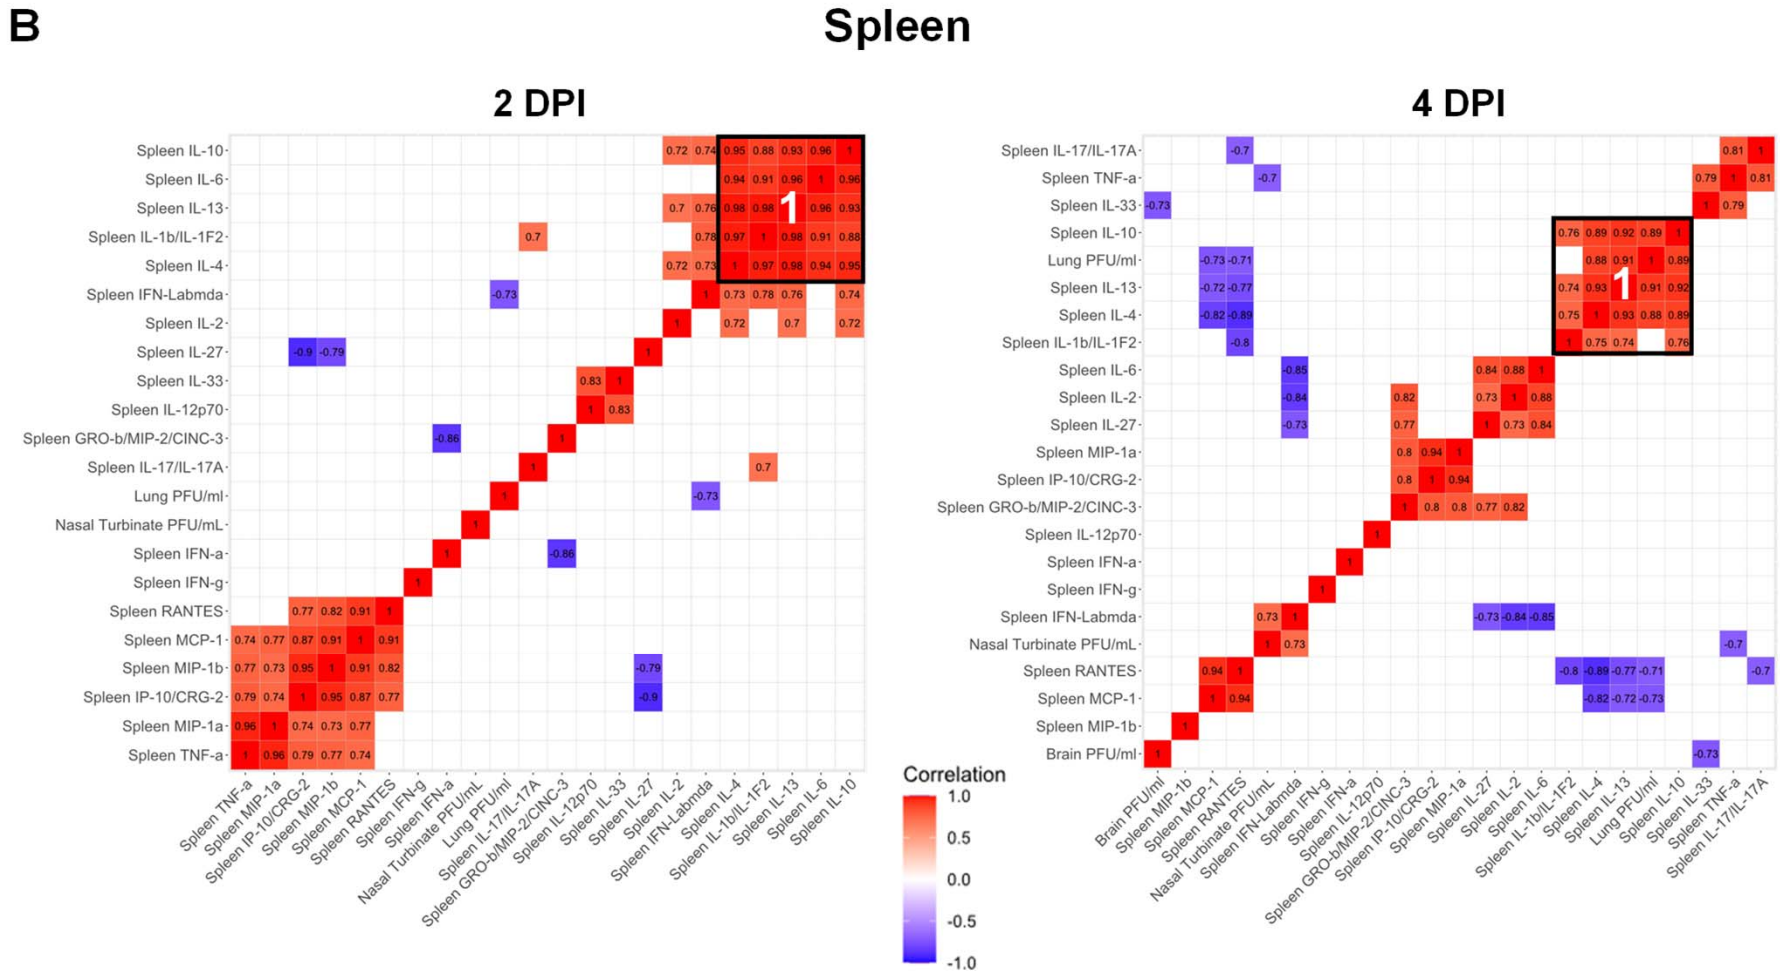



C

## Brain

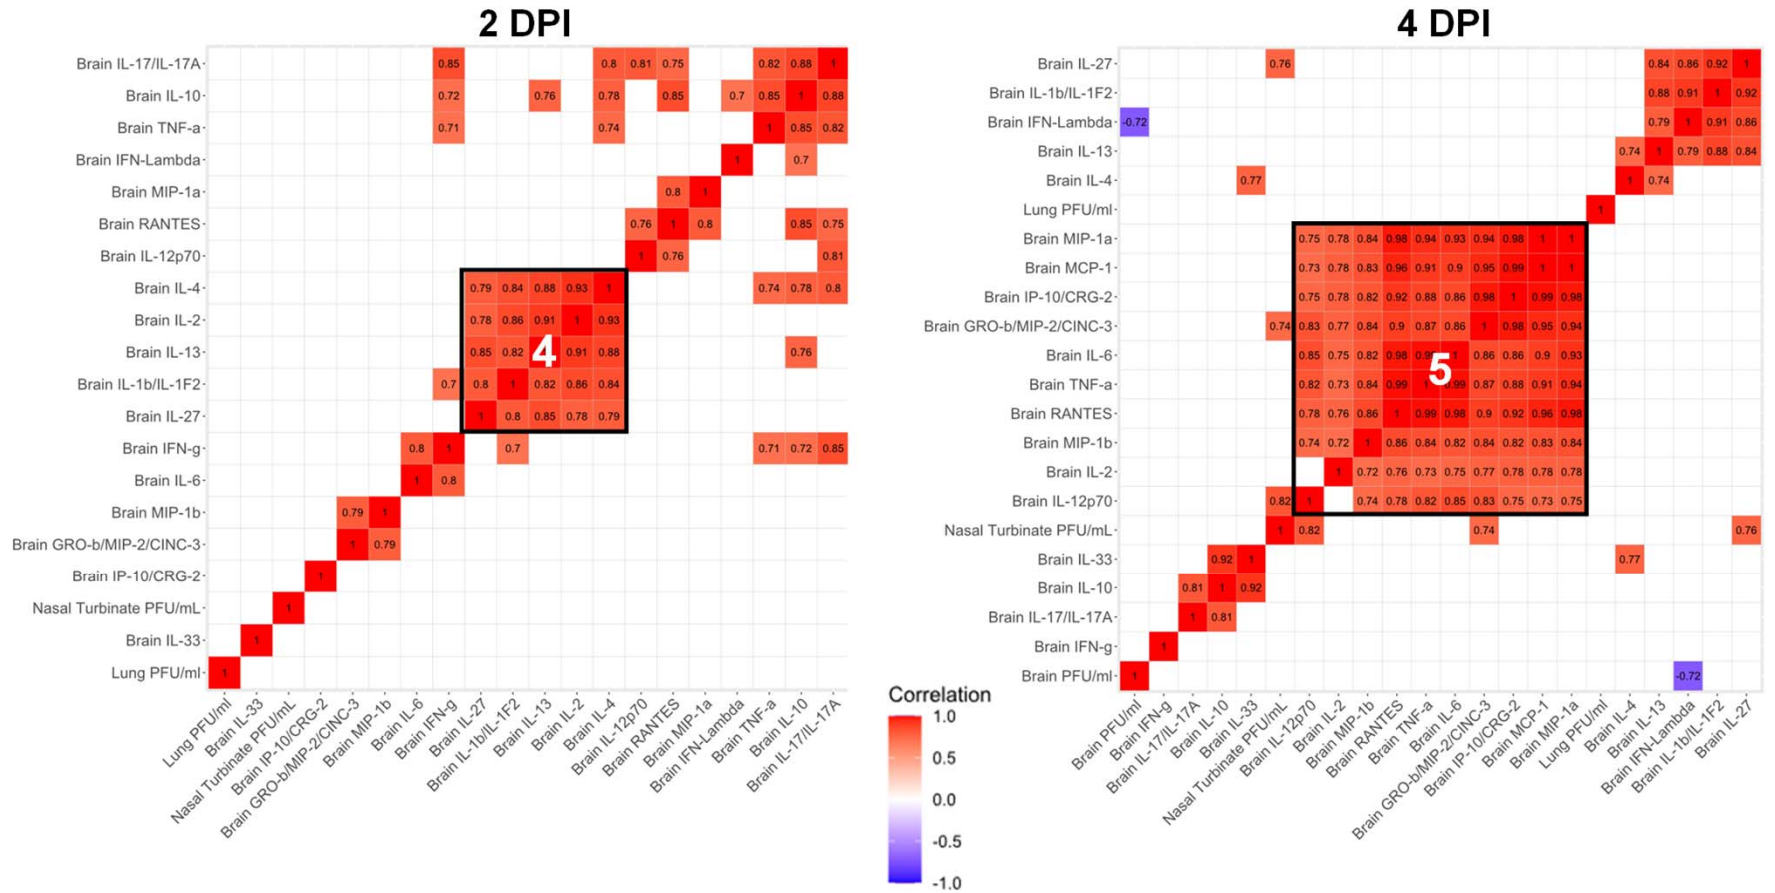

Figure 4. Continuation.

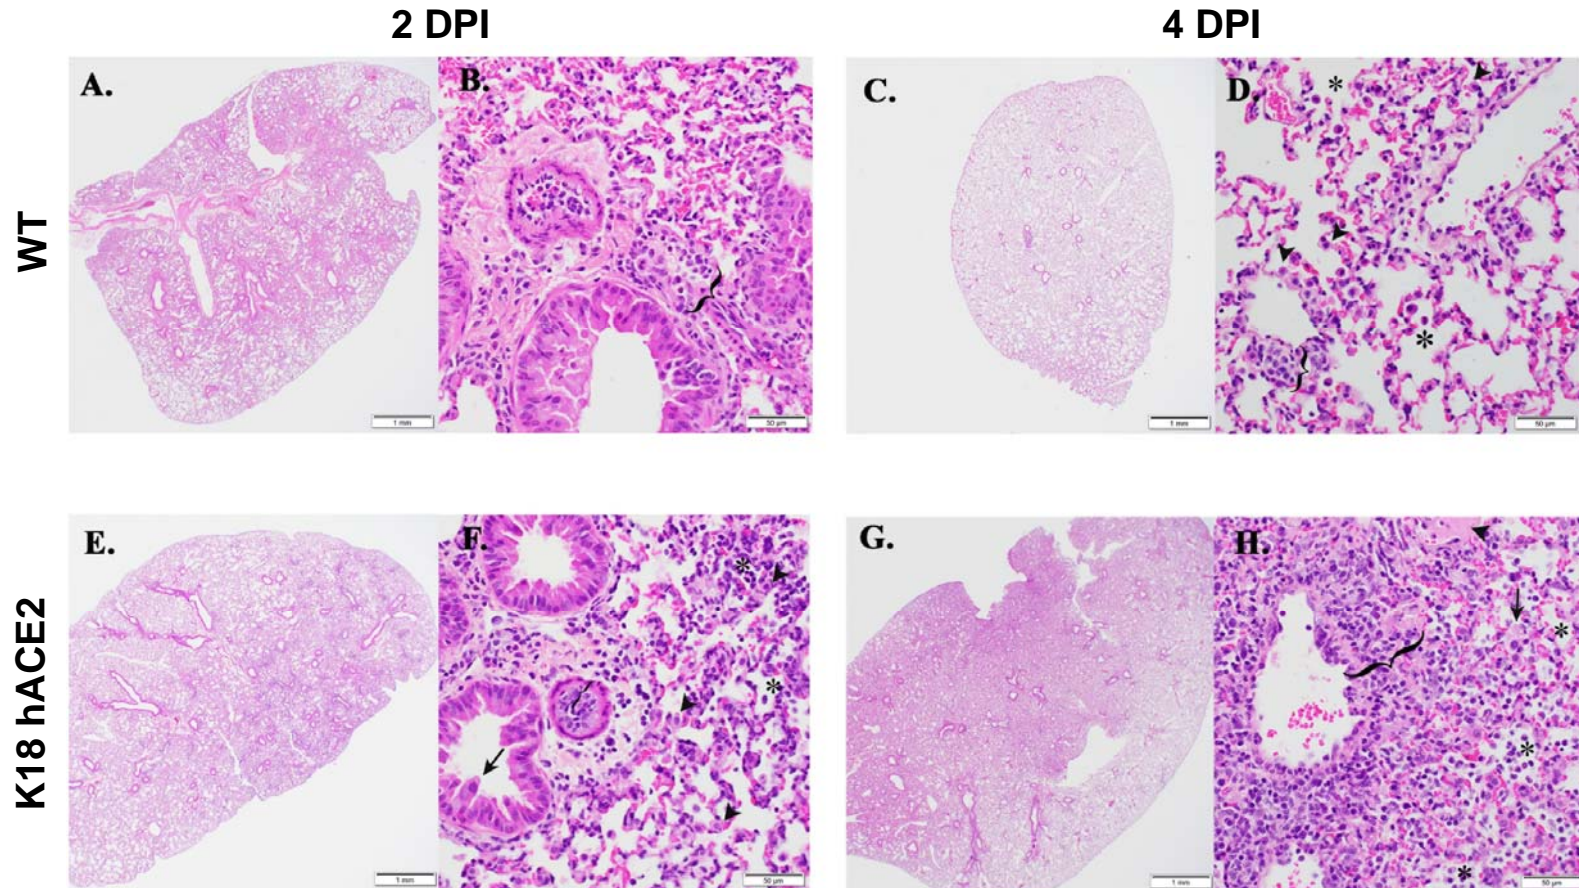

**Figure 5. K18 hACE2 transgenic mice develop rhinitis, pneumonia with associated pulmonary inflammation after infection with SARS-CoV-2.** (A-D and I-L) WT C57BL/6 mice. Minimal mononuclear and neutrophilic interstitial pneumonia in WT lung at 2-DPI (A, B bracket). By 4-DPI (5C, D) minimal alveolar histiocytosis (D, asterisk) pneumocyte type II cells (D, arrowheads), perivascular mononuclear inflammation (D, bracket) and rhinitis with low numbers of neutrophils (K, arrowhead) were variably observed. Lymphocyte aggregates in the lamina propria of the small intestine (I, asterisk). Mixed mononuclear inflammation with individual hepatocellular necrosis (J, arrowhead). Brain from WT 4-DPI was normal (L). (E-H and M-P) K18 hACE2 transgenic mice. Interstitial pneumonia (E, F) associated with alveolar histiocytosis admixed neutrophils and lymphocytes (F, asterisks), mild type II pneumocyte hyperplasia (F, arrowhead), bronchiolar syncytia (F, arrow), endothelial cells hyperplasia and vasculitis (F, bracket) by 2-DPI. Gut associated lymphoid tissue (GALT) with prominent germinal centers was observed (M, asterisk). Liver inflammation with variable amounts of individual hepatocellular necrosis (N, arrowhead). Greater lung involvement indicative of pneumonia (G), with inflammatory cellular accumulations and hemorrhage in alveolar spaces (H, asterisk) and interstitium (H, bracket), intra-alveolar fibrin admixed cellular debris (H, arrow), vasculitis (H, bracket), edema (H, arrowhead) by 4-DPI. Neutrophilic rhinitis observed at 4-DPI (O, bracket). Mild meningoencephalitis with vasculitis (P, arrowhead). Scale bars left images, 1 mm. Scale bars right images, 50 μm. DPI: Days post-infection.



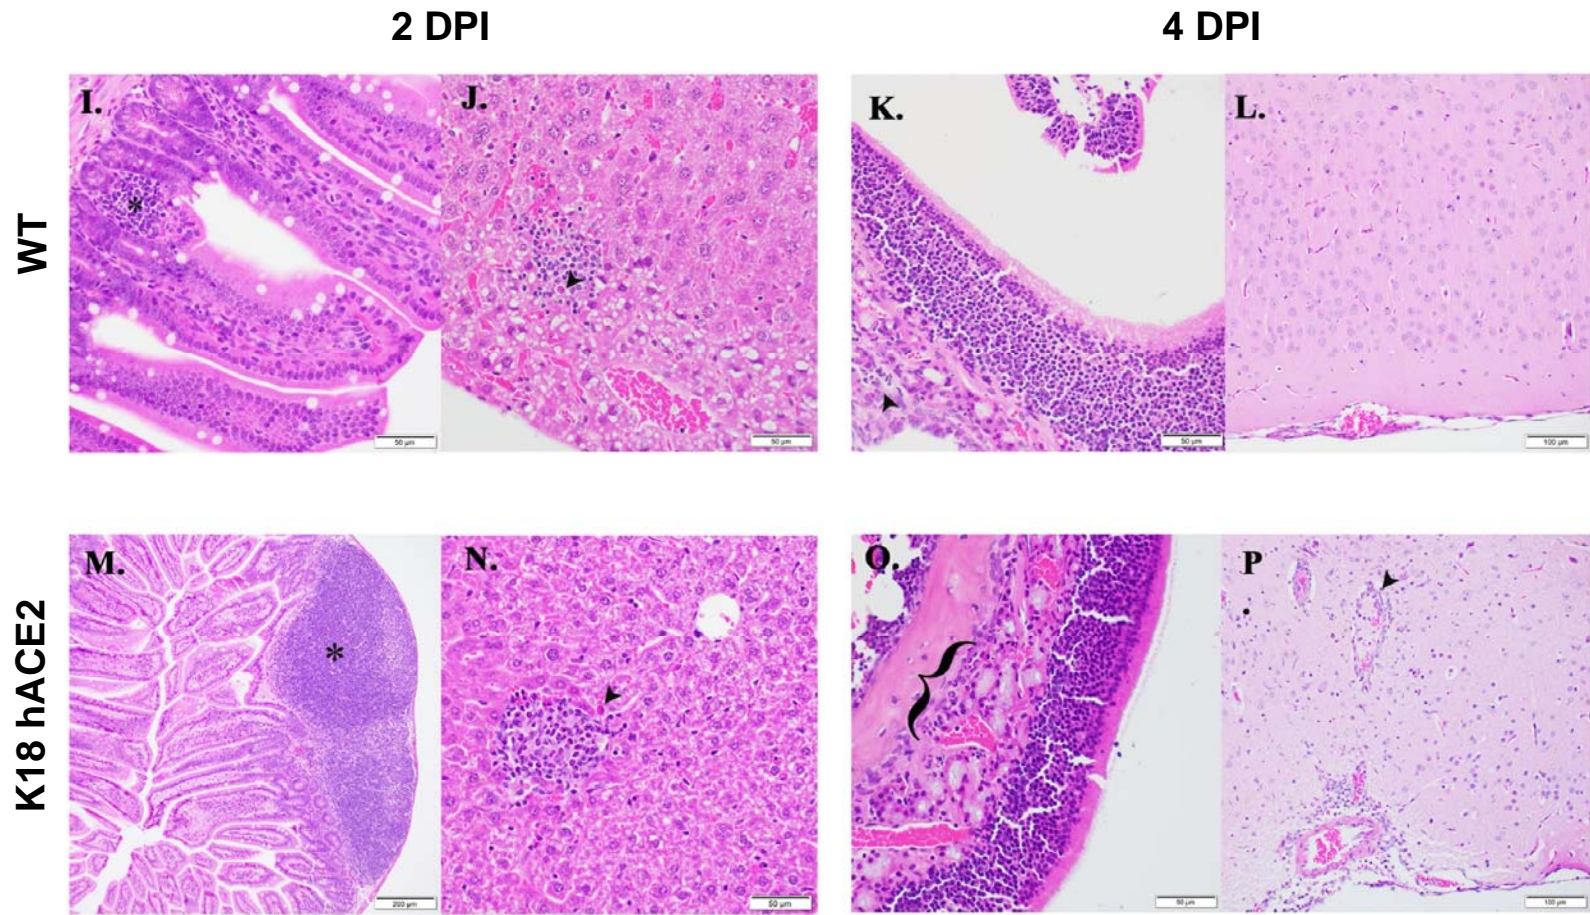

Figure 5. Continuation.



**A**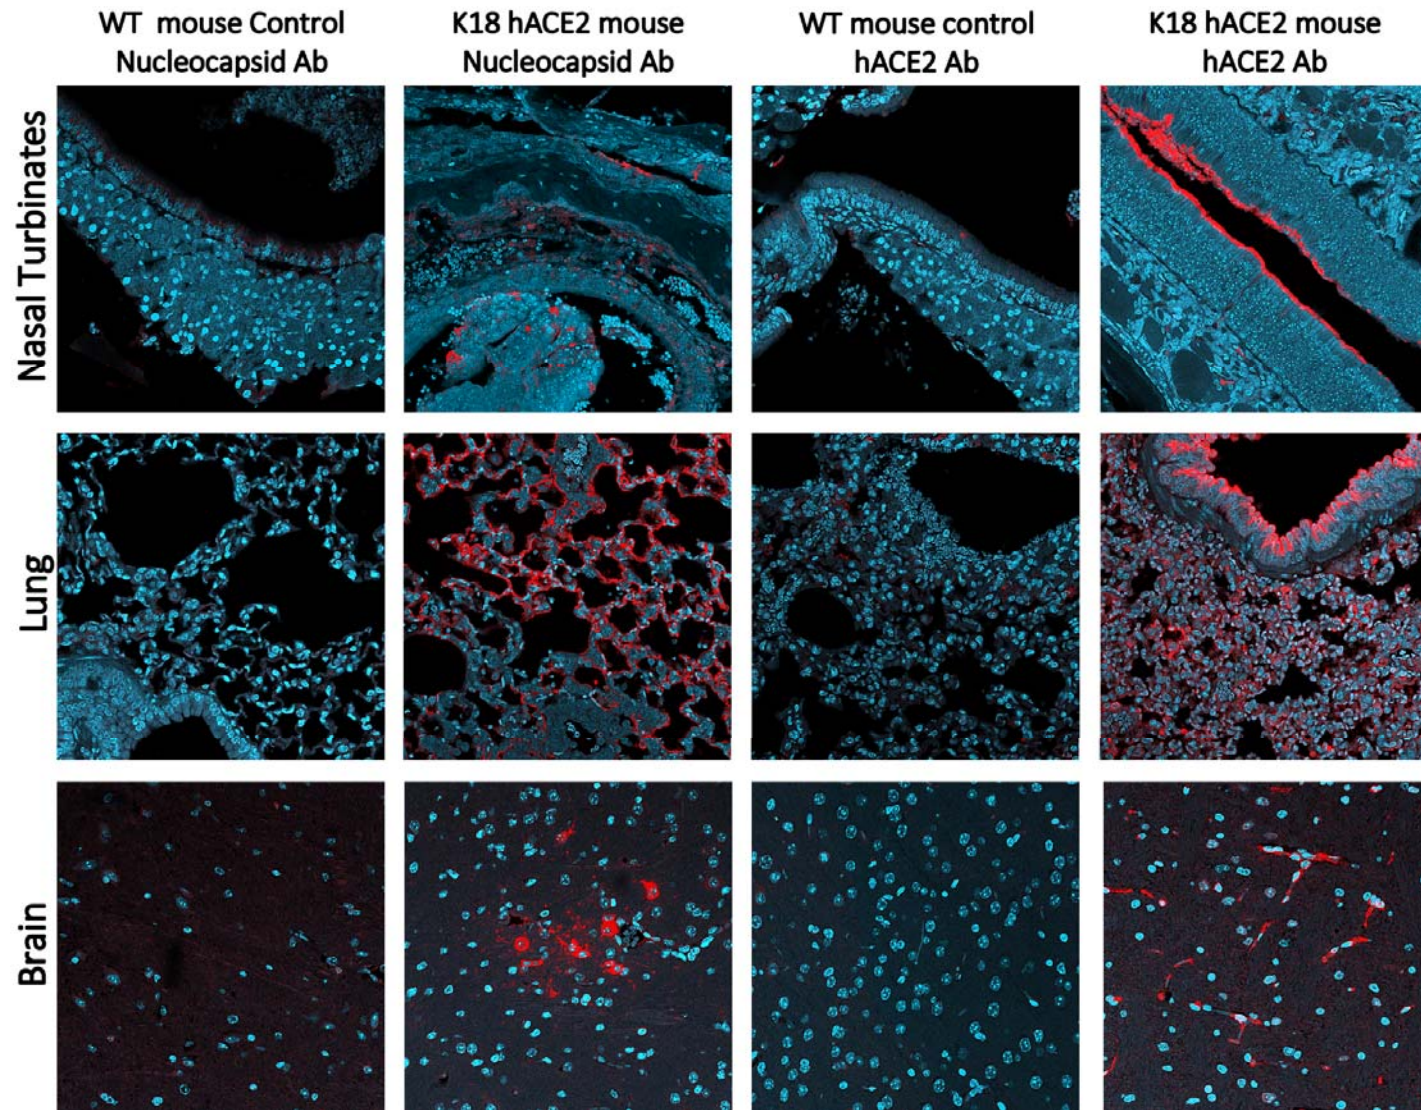

**Figure 6. IHC examination of tissue from K18 hACE2 transgenic and WT C57BL/6 mice infected with SARS-CoV-2. (A)** WT and K18 hACE2 transgenic C57BL/6 mice nasal turbinate (top, at 2-DPI), lung tissue (middle, at 2-DI) and brain (bottom, at 4-DPI) stained with an antibody against SARS-CoV-2 NP (red) or with antibody recognizing hACE2 receptor (red). **(B)** Infected choroid plexus in the brains of SARS-CoV-2-infected K18 hACE2 transgenic mice at 4-DPI. Left panel show that the hACE2 receptor (red) is highly expressed in the choroid plexus (all nuclei shown in aqua-blue). Right panel shows that some cells in the choroid plexus are infected with SARS-CoV-2 as these are positive to a SARS-CoV-2 NP (in red).

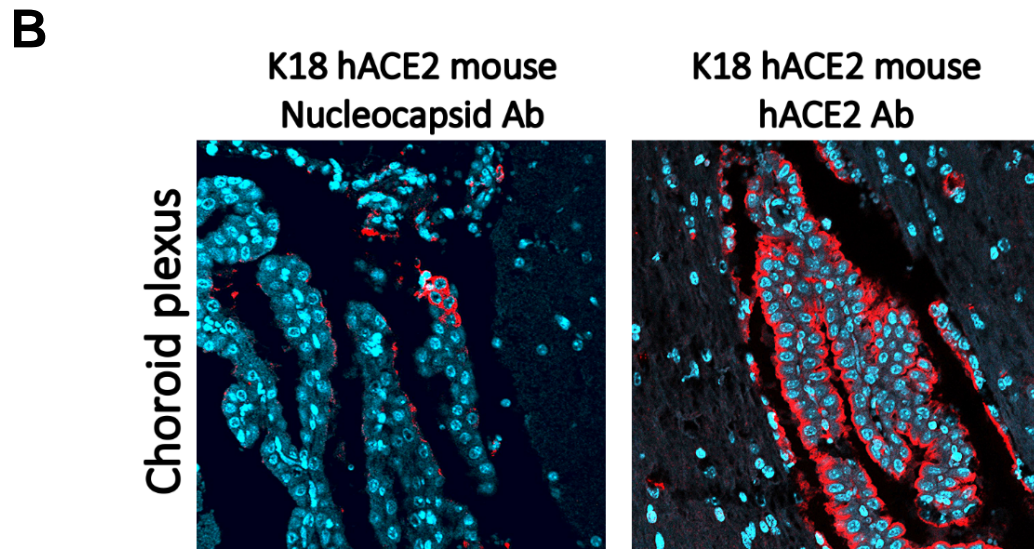

Figure 6. Continuation.
